# Supplementary material for: Unexpected long room-temperature phosphorescence lifetimes of up to 1.0 s observed in iodinated molecular systems
Source: Royal Society of Chemistry journal article supplement (doi:10.1039/d1cc04094d), 2021-01-01
Supplement: d1cc04094d1.pdf [file d1cc04094d1.pdf]

## Electronic Supplementary Information

### **Unexpected long room-temperature phosphorescence lifetimes up to 1.0 s observed in iodinated molecular systems**

Junbo Li, <sup>a,b</sup> Xuepu Wang, <sup>b</sup> Yingtong Pan, <sup>b</sup> Yan Sun, <sup>b</sup> Guangming Wang, <sup>b</sup> and Kaka Zhang <sup>\*a,b</sup>

<sup>a</sup>. College of Chemistry and Materials Science, Sichuan Normal University, Chengdu 610068, China; <sup>b</sup>. Key Laboratory of Synthetic and Self-Assembly Chemistry for Organic Functional Molecules, Shanghai Institute of Organic Chemistry, University of Chinese Academy of Sciences, Chinese Academy of Sciences, 345 Lingling Road, Shanghai 200032, People's Republic of China.

Email: zhangkaka@sioc.ac.cn

#### **Physical measurements and instrumentation**

Nuclear magnetic resonance (NMR) spectra were recorded on a JEOL Fourier-transform NMR spectrometer (400 MHz), including <sup>1</sup>H NMR, <sup>13</sup>C NMR, <sup>19</sup>F NMR and <sup>11</sup>B NMR. Mass spectra were performed on Agilent Technologies 5973N and Thermo Fisher Scientific LTQ FT Ultra mass spectrometer. FT-IR spectra were recorded on a Nicolet AVATAR-360 FT-IR spectrophotometer with a resolution of 4 cm<sup>-1</sup>. UV-Vis absorption spectra were recorded on a Techcomp UV1050 UV-vis spectrophotometer. Emission spectra were recorded using Edinburgh FLS1000 fluorescence spectrometer, Hitachi FL-7000 fluorescence spectrometer and Horiba FluoroLog-3 fluorescence spectrometer. Photoluminescence quantum yield was measured by a Hamamatsu absolute PL quantum yield measurement system based on a standard protocol (*Adv. Mater.* **1997**, *9*, 230). Photographs and videos were captured by OPPO Reno4 and HUAWEI P30 cameras. Before the capture, samples were irradiated by a 365 nm UV lamp (5 W) for approximately 5 s at a distance of approximately 15 cm. Single-crystal X-ray diffraction analysis was performed on a D8 VENTURE SC-XRD instrument. The X-ray crystallographic data for HBF<sub>2</sub> and IBF<sub>2</sub> has been deposited at the Cambridge Crystallographic Data Centre (CCDC), under the deposition number CCDC 2092212 (data\_d8v21153), 2092213 (data\_mo\_d8v20839\_0m), respectively.

#### **TD-DFT calculations**

TD-DFT calculations were carried out on ORCA 4.2.1 program with B3LYP functional and def2-TZVP(-f) basis set. The optimized geometry of IBF<sub>2</sub> ground state was obtained by a DFT calculation from single-crystal structure using B3LYP functional and def2-TZVP(-f) basis set. Spin-orbit coupling (SOC) matrix elements between the singlet excited states and triplet excited states were calculated with spin-orbit mean-field (SOMF) methods. The obtained electronic structures were analyzed by Multiwfn software. All isosurface maps to show the electron

distribution and electronic transitions were rendered by Visual Molecular Dynamics (VMD) software based on the exported files from Multiwfn (F. Neese, *Wiley Interdiscip. Rev.: Comput. Mol. Sci.* **2018**, *8*, 1327-1332; A. D. Becke, *Phys. Rev. A* **1988**, *38*, 3098-3100; C. Lee, W. Yang, R. G. Parr, *Phys. Rev. B* **1988**, *37*, 785-789; B. Miehl, A. Savin, H. Stoll, H. Preuss, *Chem. Phys. Lett.* **1989**, *157*, 200-206; F. Weigend, R. Ahlrichs, *Phys. Chem. Chem. Phys.* **2005**, *7*, 3297-3305; T. Lu, F. Chen, *J. Comput. Chem.* **2012**, *33*, 580-592; W. Humphrey, A. Dalke, K. Schulten, *J. Mol. Graphics* **1996**, *14*, 33-38).

### Synthesis of HBF<sub>2</sub> via cascade reaction

Into a round bottom flask was added 0.36 mL acetophenone (3.0 mmol), 4.00 mL acetic anhydride and 1.20 mL boron trifluoride diethyl etherate (9.5 mmol). The reaction mixture was heated to 70 °C for 2 h. After cooling to room temperature, the reaction mixture was extracted with dichloromethane and washed with deionized water. The obtained crude product in dichloromethane was dried over anhydrous sodium sulphate, condensed by rotary evaporation, and then purified by column chromatography over silica gel using the petroleum ether/dichloromethane (1/1, v/v) as eluent to give 520 mg pale yellow solids with an isolation yield of 82.5%. The HBF<sub>2</sub> was further purified by three cycles of recrystallization in spectroscopic grade dichloromethane/hexane. Single crystal of HBF<sub>2</sub> was grown from dichloromethane/hexane. <sup>1</sup>H NMR (400 MHz, Chloroform-*d*, 298K, relative to Me<sub>4</sub>Si /ppm) δ 8.09 – 8.04 (m, 2H), 7.73 – 7.66 (m, 1H), 7.54 (t, *J* = 7.9 Hz, 2H), 6.58 (s, 1H), 2.43 (s, 3H). <sup>13</sup>C{<sup>1</sup>H} NMR (101 MHz, Chloroform-*d*) δ 192.61, 182.93, 135.49, 131.20, 129.20, 129.03, 97.45, 24.80. <sup>19</sup>F{<sup>1</sup>H} NMR (376 MHz, Chloroform-*d*, 298 K, relative to CFCl<sub>3</sub> /ppm) δ -139.17 (19.6%), -139.23 (80.4%). <sup>11</sup>B{<sup>1</sup>H} NMR (128 MHz, Chloroform-*d*, 298 K, relative to BF<sub>3</sub>·OEt<sub>2</sub> /ppm) δ 0.05. LRMS, *m/z* 209. HRMS (positive EI) *m/z* found (calcd for C<sub>10</sub>H<sub>9</sub>O<sub>2</sub><sup>10</sup>BF<sub>2</sub>): 209.0690 (209.0694).

### Synthesis of FBF<sub>2</sub> via cascade reaction

Into a round bottom flask was added 0.21 mL 4-fluoroacetophenone (2.0 mmol), 2.00 mL acetic anhydride and 0.80 mL boron trifluoride diethyl etherate (6.3 mmol). The reaction mixture was heated to 70 °C for 2 h. After cooling to room temperature, the reaction mixture was extracted with dichloromethane and washed with deionized water. The obtained crude product in dichloromethane was dried over anhydrous sodium sulphate, condensed by rotary evaporation, and then purified by column chromatography over silica gel using the petroleum ether/dichloromethane (1/1, v/v) as eluent to give 315 mg solids with an isolation yield of 69.1%. The FBF<sub>2</sub> was further purified by three cycles of recrystallization in spectroscopic grade dichloromethane/hexane. <sup>1</sup>H NMR (400 MHz, Chloroform-*d*, 298K, relative to Me<sub>4</sub>Si /ppm) δ 8.15 – 8.07 (m, 2H), 7.25 – 7.19 (m, 2H), 6.53 (s, 1H), 2.43 (s, 3H). <sup>13</sup>C{<sup>1</sup>H} NMR (101 MHz, Chloroform-*d*) δ 192.81, 181.57, 168.61, 166.02, 131.96, 131.87, 127.55, 116.89, 116.67, 97.24, 24.91. <sup>19</sup>F{<sup>1</sup>H} NMR (376 MHz, Chloroform-*d*, 298 K, relative to CFCl<sub>3</sub> /ppm) δ -100.36; -139.20 (19.8%), -139.26 (80.2%). <sup>11</sup>B{<sup>1</sup>H} NMR (128 MHz, Chloroform-*d*, 298 K, relative to BF<sub>3</sub>·OEt<sub>2</sub> /ppm) δ 0.01. LRMS, *m/z* 228. HRMS (positive EI) *m/z* found (calcd for C<sub>10</sub>H<sub>8</sub>O<sub>2</sub><sup>10</sup>BF<sub>3</sub>): 227.0597 (227.0600).

### Synthesis of ClBF<sub>2</sub> via cascade reaction

Into a round bottom flask was added 0.13 mL 4-chloroacetophenone (1.0 mmol), 2.00 mL acetic anhydride and 0.40 mL boron trifluoride diethyl etherate (3.2 mmol). The reaction mixture was heated to 70 °C for 2 h. After cooling to room temperature, the reaction mixture was extracted with dichloromethane and washed with deionized water. The obtained crude product in dichloromethane was dried over anhydrous sodium sulphate, condensed by rotary evaporation, and then purified by column chromatography over silica gel using the petroleum ether/dichloromethane (1/1, v/v) as eluent to give 172 mg solids with an isolation yield of 70.5%. The ClBF<sub>2</sub> was further purified by three cycles of recrystallization in spectroscopic grade dichloromethane/hexane. <sup>1</sup>H NMR (400 MHz, Chloroform-*d*, 298K, relative to Me<sub>4</sub>Si /ppm) δ 8.03 – 7.97 (m, 2H), 7.55 – 7.49 (m, 2H), 6.54 (s, 1H), 2.44 (s, 3H). <sup>13</sup>C{<sup>1</sup>H} NMR (101 MHz, Chloroform-*d*) δ 193.31, 181.62, 142.32, 130.32, 129.75, 129.70, 97.47, 24.99. <sup>19</sup>F{<sup>1</sup>H} NMR (376 MHz, Chloroform-*d*, 298 K, relative to CFCl<sub>3</sub> /ppm) δ -139.00 (19.8%), -139.06 (80.2%). <sup>11</sup>B{<sup>1</sup>H} NMR (128 MHz, Chloroform-*d*, 298 K, relative to BF<sub>3</sub>·OEt<sub>2</sub> /ppm) δ 0.02. LRMS, m/z 244. HRMS (positive EI) m/z found (calcd for C<sub>10</sub>H<sub>8</sub>O<sub>2</sub><sup>10</sup>BClF<sub>2</sub>): 243.0299 (243.0305).

### Synthesis of BrBF<sub>2</sub> via cascade reaction

Into a round bottom flask was added 600 mg 4-bromoacetophenone (3.0 mmol), 4.00 mL acetic anhydride and 1.20 mL boron trifluoride diethyl etherate (9.5 mmol). The reaction mixture was heated to 70 °C for 2 h. After cooling to room temperature, the reaction mixture was extracted with dichloromethane and washed with deionized water. The obtained crude product in dichloromethane was dried over anhydrous sodium sulphate, condensed by rotary evaporation, and then purified by column chromatography over silica gel using the petroleum ether/dichloromethane (1/1, v/v) as eluent to give 690 mg yellow solids with an isolation yield of 79.6%. The BrBF<sub>2</sub> was further purified by three cycles of recrystallization in spectroscopic grade dichloromethane/hexane. <sup>1</sup>H NMR (400 MHz, Chloroform-*d*, 298K, relative to Me<sub>4</sub>Si /ppm) δ 7.94 – 7.89 (m, 2H), 7.71 – 7.66 (m, 2H), 6.54 (s, 1H), 2.43 (s, 3H). <sup>13</sup>C{<sup>1</sup>H} NMR (101 MHz, Acetone-*d*<sub>6</sub>) δ 196.02, 181.88, 133.57, 131.47, 131.42, 130.97, 98.86, 24.90. <sup>19</sup>F{<sup>1</sup>H} NMR (376 MHz, Chloroform-*d*, 298 K, relative to CFCl<sub>3</sub> /ppm) δ -138.93 (19.9%), -138.99 (80.1%). <sup>11</sup>B{<sup>1</sup>H} NMR (128 MHz, Chloroform-*d*, 298 K, relative to BF<sub>3</sub>·OEt<sub>2</sub> /ppm) δ 0.01. FT-IR (KBr, cm<sup>-1</sup>): ν 3139.8, 3102.3, 1591.4, 1536.6, 1489.1, 1441.3, 1404.8, 1369.5, 1350.2, 1302.9, 1279.8, 1199.5, 1182.0, 1153.4, 1120.8, 1107.3, 1091.0, 1057.8, 1006.5, 977.2, 873.3, 843.9, 828.5, 806.8, 775.5, 741.5, 687.9, 582.9, 490.7, 469.0, 417.8. LRMS, m/z 288. HRMS (positive EI) m/z found (calcd for C<sub>10</sub>H<sub>8</sub>O<sub>2</sub><sup>10</sup>BBrF<sub>2</sub>): 286.9795 (286.9800).

### Synthesis of IBF<sub>2</sub> via cascade reaction

Into a round bottom flask was added 492 mg 4-iodoacetophenone (2.0 mmol), 3.00 mL acetic anhydride and 0.80 mL boron trifluoride diethyl etherate (6.3 mmol). The reaction mixture was heated to 70 °C for 2 h. After cooling to room temperature, the reaction mixture was extracted with dichloromethane and washed with deionized water. The obtained crude product in dichloromethane was dried over anhydrous sodium sulphate, condensed by rotary evaporation, and then purified by column chromatography over silica gel using the petroleum ether/

dichloromethane (1/1, v/v) as eluent to give 480 mg yellow solids with an isolation yield of 71.5%. The IBF<sub>2</sub> was further purified by three cycles of recrystallization in spectroscopic grade dichloromethane/hexane. Single crystal of IBF<sub>2</sub> was grown from dichloromethane/hexane. <sup>1</sup>H NMR (400 MHz, Chloroform-*d*, 298K, relative to Me<sub>4</sub>Si /ppm) δ 7.91 (d, J = 9.0 Hz, 2H), 7.77 – 7.72 (m, 2H), 6.54 (s, 1H), 2.43 (s, 3H). <sup>13</sup>C{<sup>1</sup>H} NMR (101 MHz, Chloroform-*d*) δ 193.31, 181.95, 138.65, 130.60, 129.95, 104.15, 97.34, 24.94. <sup>19</sup>F{<sup>1</sup>H} NMR (376 MHz, Chloroform-*d*, 298 K, relative to CFCl<sub>3</sub> /ppm) δ -138.95 (20.7%), -138.99 (79.3%). <sup>11</sup>B{<sup>1</sup>H} NMR (128 MHz, Chloroform-*d*, 298 K, relative to BF<sub>3</sub>·OEt<sub>2</sub> /ppm) δ 0.01. FT-IR (KBr, cm<sup>-1</sup>): ν 3132.5, 3092.9, 1586.3, 1576.3, 1532.5, 1482.8, 1439.0, 1402.1, 1366.0, 1349.0, 1304.8, 1276.8, 1199.9, 1187.2, 1150.6, 1122.0, 1107.5, 1088.0, 1054.6, 1003.4, 976.5, 961.4, 872.6, 849.5, 834.6, 810.5, 775.3, 741.9, 688.8, 671.8, 581.0, 489.8, 464.6. LRMS, m/z 336. HRMS (positive EI) m/z found (calcd for C<sub>10</sub>H<sub>8</sub>O<sub>2</sub><sup>10</sup>BF<sub>2</sub>I): 334.9663 (334.9661).

## Supporting Texts

**Text S1.** In the reported studies, iodinated BF<sub>2</sub>bdk compounds have also been synthesized and used for the fabrication of room-temperature phosphorescence materials. For example, the iodinated BF<sub>2</sub>bdk in the reported study (*J. Phys. Chem. A* 2017, **121**, 8652) possess similar functional groups but different conjugation lengths when compared to the present iodinated BF<sub>2</sub>bdk compounds. We understand that subtle change of molecular structures may lead to drastic change of photophysical studies in the research area of room-temperature phosphorescence materials. The present study achieves room-temperature phosphorescence lifetimes up to 1.0 s in IBF<sub>2</sub>-PhB-0.05% samples, whereas phosphorescence lifetimes around 1.0 ms have been observed in the reported study (*J. Phys. Chem. A* 2017, **121**, 8652). Therefore, the present study is different from the reported study (*J. Phys. Chem. A* 2017, **121**, 8652) in both molecular structures and photophysical properties.

**Text S2.** The photoluminescence quantum yields, rather than phosphorescence quantum yields, of HBF<sub>2</sub>-PhB-0.05% and IBF<sub>2</sub>-PhB-0.05% are determined to be 9.6% and 9.2%, respectively. The phosphorescence quantum yields should be lower than these values, but an accurate estimation of phosphorescence quantum yields for the present system would be difficult because of the overlap of fluorescence bands and phosphorescence bands. Despite of these, the afterglow brightness and duration of IBF<sub>2</sub>-PhB-0.05% samples is still significant because of their long emission lifetimes.

**Text S3.** With reference to the reported studies (*J. Am. Chem. Soc.*, 2007, **129**, 8942), the double-exponential decay of the fluorescence can be caused by the heterogeneous microenvironments in the solid samples. For the triple-exponential decay of IBF<sub>2</sub>-PhB-0.05% samples, the  $\tau_1$  part (17.4 ms, 1.0%) can be assigned as fluorescence decay; similar to the reported studies (*Nat. Commun.* 2020, **11**, 842; *Chem. Lett.* 2019, **48**, 126), the fluorescence lifetimes measured by microsecond flash lamp have been found to be in microsecond and even millisecond regimes. The  $\tau_2$  part (246 ms, 8.0%) and  $\tau_3$  part (1046 ms, 91%) can be attributed to the phosphorescence from IBF<sub>2</sub> triplet excited states in the heterogeneous solid microenvironments. The fluorescence lifetimes of ClBF<sub>2</sub>-PhB-0.05%, BrBF<sub>2</sub>-PhB-0.05% and IBF<sub>2</sub>-PhB-0.05% samples are shorter than those of HBF<sub>2</sub>-PhB-0.05% and FBF<sub>2</sub>-PhB-0.05% samples (Table 1). For XBF<sub>2</sub>-PhB-0.05% samples (X = Cl, Br, I), the fluorescence lifetimes follow the order of Cl > Br > I, which is in line with the heavy atom effect in organic phosphorescence systems.

**Text S4.** Donor-acceptor pairs that show intermolecular charge transfer properties have been reported to show excellent afterglow behaviors (*Nature* 2017, **550**, 384), which is caused by the retarded charge recombination between photo-generated radical cations and radical anions in solid matrices. PhB matrices have low-lying HOMOs and high-lying LUMOs, so intermolecular charge transfer between PhB and IBF<sub>2</sub> is insignificant and thus the donor-acceptor afterglow mechanism can be ruled out in the present study.

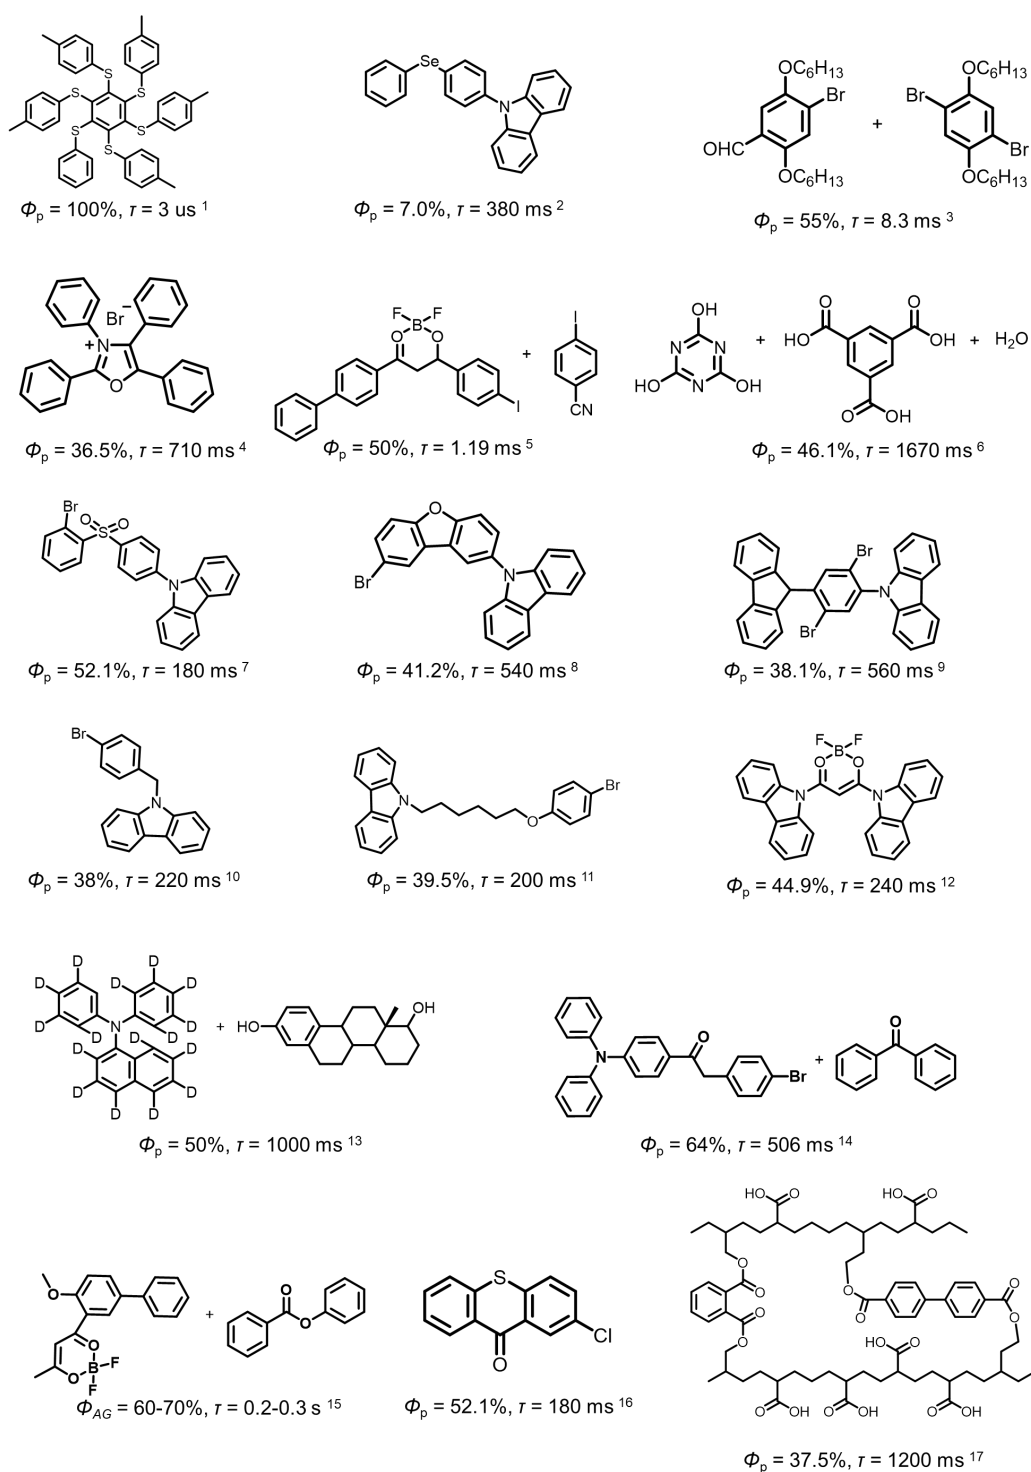

**Figure S1.** Selected room-temperature phosphorescence organic systems that contain heavy atoms and show long phosphorescence lifetimes, as well as room-temperature phosphorescence and afterglow systems with emission lifetimes around 1.0 s.<sup>1-60</sup> At ambient conditions, we have not found any iodine containing phosphorescence systems that possess emission lifetimes up to 1.0 s, neither in single-component systems nor in dopant-matrix systems at low doping concentrations. Therefore, at room temperature, when doped in PhB matrices at 0.05 wt%, the present IBF<sub>2</sub> molecules possess 38 wt% iodine substituents but show such a long  $\tau_P$  up to 1.0 s in the dopant-matrix systems; this is an unexpected observation.

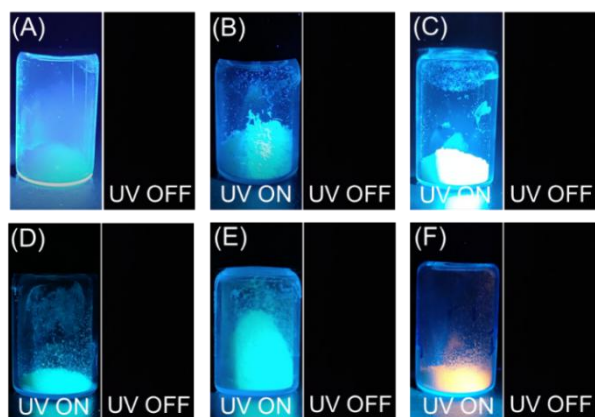

**Figure S2.** Photographs of (A) phenyl benzoate (PhB) powders and (B-F) BF<sub>2</sub>bdk powders (B, HBF<sub>2</sub>; C, FBF<sub>2</sub>; D, ClBF<sub>2</sub>; E, BrBF<sub>2</sub>; F, IBF<sub>2</sub>) at room temperature under 365 nm UV light and after removal of 365 nm UV light.

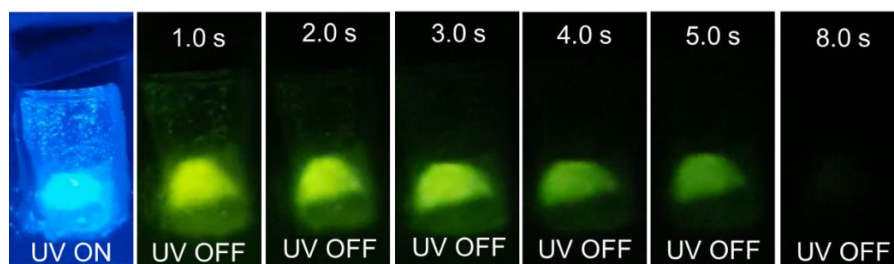

**Figure S3.** Photographs of HBF<sub>2</sub> powders at 77 K under 365 nm UV light and after removal of 365 nm UV light.

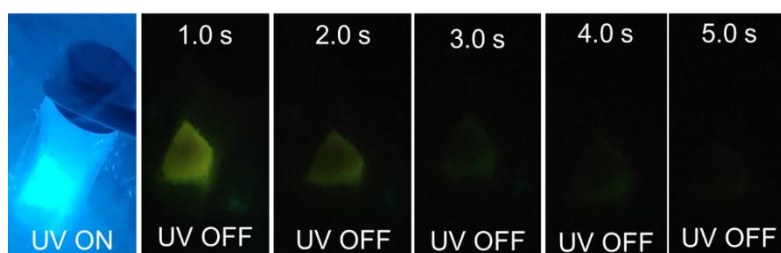

**Figure S4.** Photographs of FBF<sub>2</sub> powders at 77 K under 365 nm UV light and after removal of 365 nm UV light.

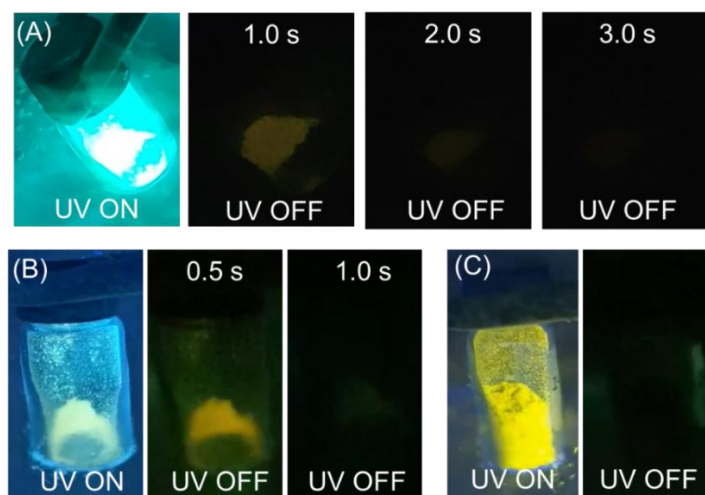

**Figure S5.** Photographs of (A)  $\text{ClBF}_2$ , (B)  $\text{BrBF}_2$  and (C)  $\text{IBF}_2$  powders at 77 K under 365 nm UV light and after removal of 365 nm UV light.

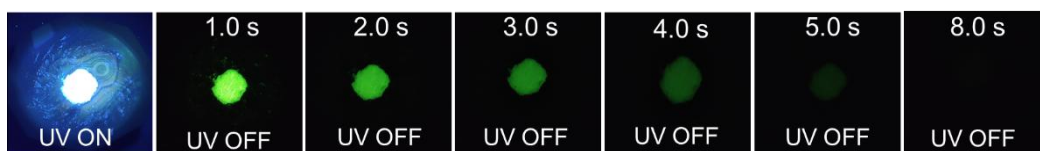

**Figure S6.** Photographs of  $\text{IBF}_2$ -PhB-0.05% afterglow powders independently prepared by Yingtong Pan (a coauthor of this manuscript) under 365 nm UV light and after removal of 365 nm UV light. The  $\text{IBF}_2$  compound used here was also independently synthesized by Yingtong Pan.

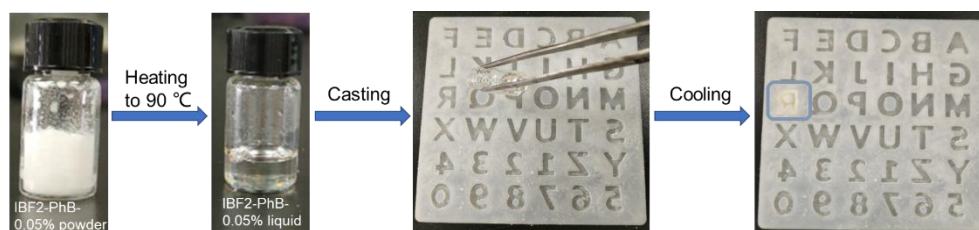

**Figure S7.** The process of preparing afterglow objects of  $\text{IBF}_2$ -PhB-0.05% by melt casting with the aid of silicone molds.

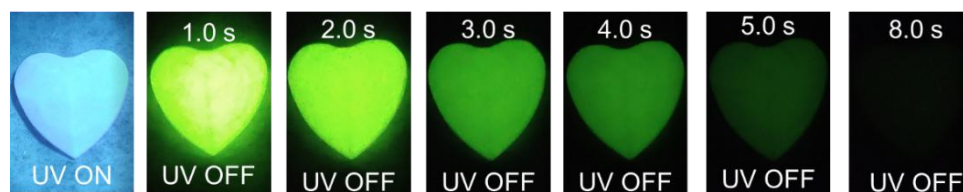

**Figure S8.** Photographs of the melt-cast heart-shaped object of  $\text{IBF}_2$ -PhB-0.05% under 365 nm UV light and after removal of the UV light.



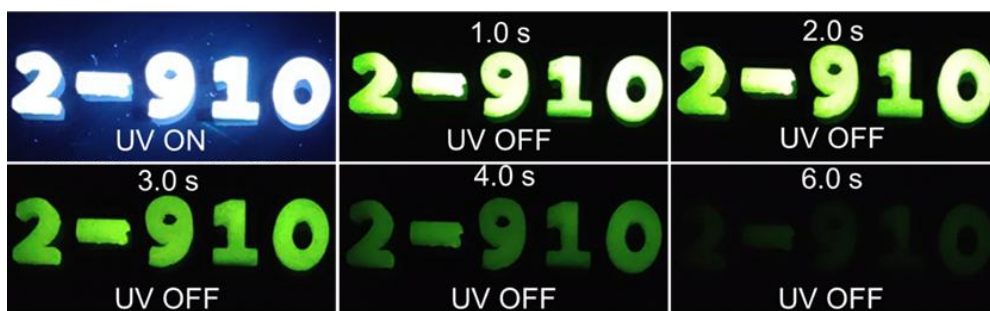

**Figure S9.** Photographs of the melt-cast object of IBF<sub>2</sub>-PhB-0.05% that show our lab room number under 365 nm UV light and after removal of the UV light.

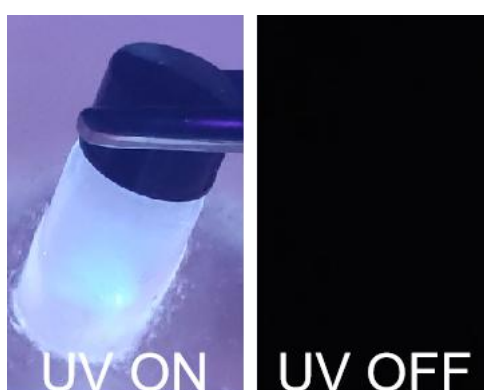

**Figure S10.** Photographs of phenyl benzoate (PhB) powders at 77 K under 365 nm UV light and after removal of 365 nm UV light. At 77 K, no visible afterglow has been observed for the PhB powders. This observation, together with their molecular structures, suggests that PhB matrices possess high  $T_1$  levels.

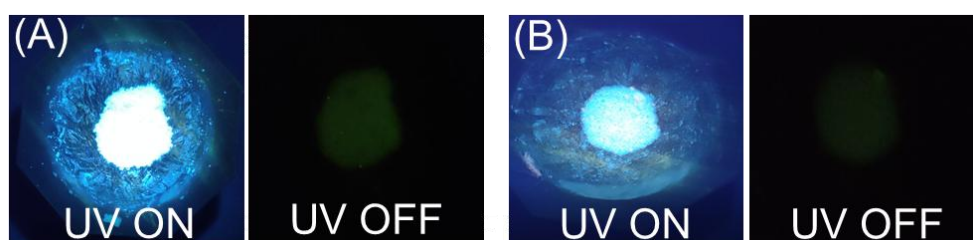

**Figure S11.** Photographs of (A) IBF<sub>2</sub>-BP-0.05% and (B) IBF<sub>2</sub>-benzanilide-0.05% powders under 365 nm UV light and after removal of 365 nm UV light.

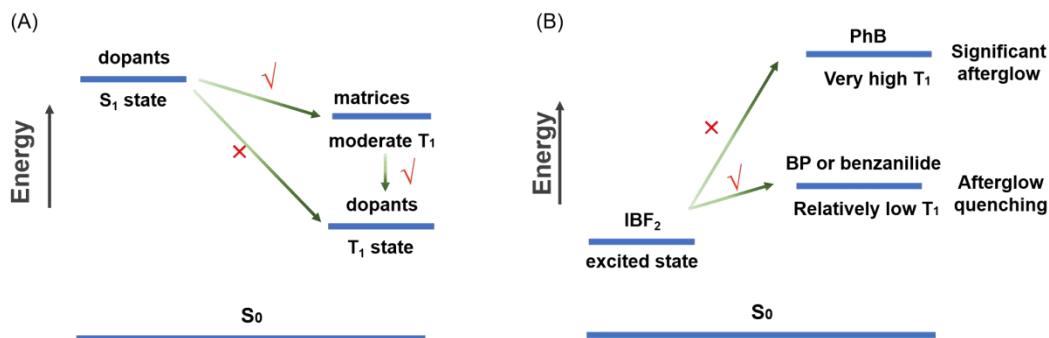

**Figure S12.** (A-B) The role of organic matrices reported in recent dopant-matrix afterglow systems (A) and in the present afterglow system (B). It has been reported in recent studies that the triplet excited states of organic matrices with energy levels sandwiched between the  $S_1$  and  $T_1$  levels of luminescent dopants can mediate the singlet-to-triplet intersystem crossing of the luminescent dopants, leading to the room-temperature organic afterglow (*Angew. Chem. Int. Ed.* 2020, **59**, 16054; *Nature Commun.* 2021, **12**, 3522). This mediation of intersystem crossing is not the case in the present study since the  $T_1$  level of PhB matrices is higher than both the singlet and triplet excited states of IBF<sub>2</sub> molecules. Actually, the high  $T_1$  level of PhB matrices is very important in the present study to avoid the triplet-to-triplet energy transfer from IBF<sub>2</sub> triplets to the triplet excited states of organic matrices. As discussed in the manuscript, when benzophenone and benzanilide matrices with lower  $T_1$  levels were used as organic matrices, the obtained IBF<sub>2</sub>-benzophenone-0.05% and IBF<sub>2</sub>-benzanilide-0.05% samples show insignificant room-temperature afterglow; the afterglow quenching is caused by the triplet-to-triplet excited energy transfer from IBF<sub>2</sub> triplet excited states to benzophenone and benzanilide triplet excited states. These observations and analyses receive support from the reported studies by Adachi and coworkers on dopant-matrix systems (*Adv. Funct. Mater.* 2013, **23**, 3386). For the BF<sub>2</sub>bkd-matrix systems, it is found that, in our previous studies (*Adv. Optical Mater.* 2021, 2100353; *Angew. Chem. Int. Ed.* 2021, **60**, 17138), the organic matrices with carbonyl functional groups can perturb and interact with the excited states of the luminescent dopants via dipole-dipole interaction, reduce  $\Delta E_{ST}$ , and thus enhance intersystem crossing of the luminescent dopants, leading to the emergency of organic afterglow properties; this is our understanding on the role of organic matrices in the present dopant-matrix system. Besides, the rigid microenvironments provided by PhB organic matrices can also restrict the nonradiative deactivation of IBF<sub>2</sub> triplet excited states and protect the triplet excited states from oxygen quenching.

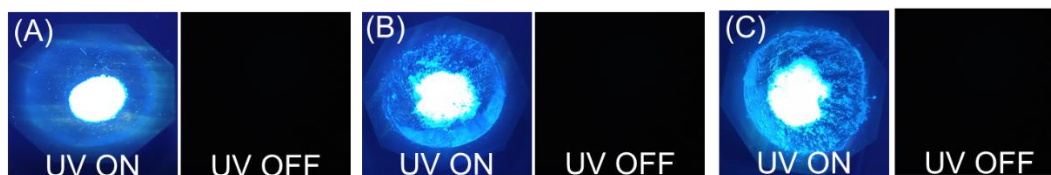

**Figure S13.** Photographs of (A) HBF<sub>2</sub>-PhB-0.05%, (B) FBF<sub>2</sub>-PhB-0.05% and (C) ClBF<sub>2</sub>-PhB-0.05% afterglow powders under 365 nm UV light and after removal of 365 nm UV light.

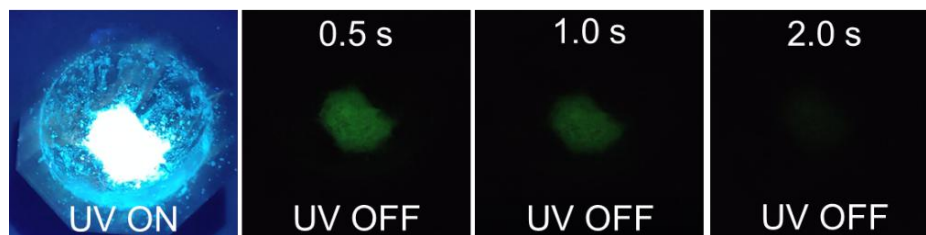

**Figure S14.** Photographs of BrBF<sub>2</sub>-PhB-0.05% afterglow powders under 365 nm UV light and after removal of 365 nm UV light.

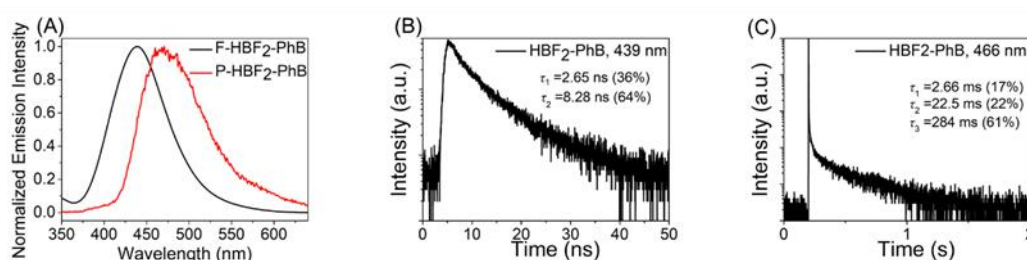

**Figure S15.** (A) Room-temperature fluorescence and phosphorescence spectra of HBF<sub>2</sub>-PhB-0.05% powders. The phosphorescence spectra of HBF<sub>2</sub>-PhB-0.05% powders show single peak at 466 nm. (B) Room-temperature fluorescence decay of HBF<sub>2</sub>-PhB-0.05% monitored at 439 nm. (C) Room-temperature phosphorescence decay of HBF<sub>2</sub>-PhB-0.05% monitored 466 nm.

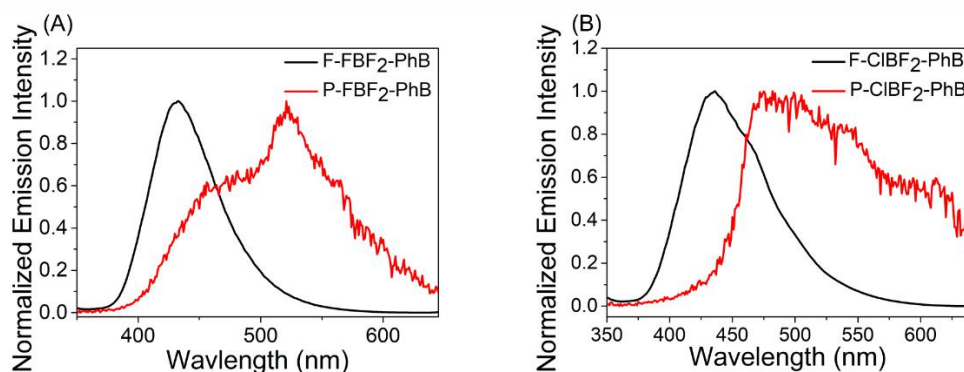

**Figure S16.** Room-temperature fluorescence and phosphorescence spectra of (A) FBF<sub>2</sub>-PhB-0.05% and (B) CIBF<sub>2</sub>-PhB-0.05% powders. The phosphorescence spectra of FBF<sub>2</sub>-PhB-0.05% and CIBF<sub>2</sub>-PhB-0.05% powders are noisy. The phosphorescence decay of FBF<sub>2</sub>-PhB-0.05% and CIBF<sub>2</sub>-PhB-0.05% powders monitored at 521 nm and 500 nm, respectively, have also been measured to show insignificant signals (data not shown). Therefore, we didn't give further interpretation on these noisy phosphorescence spectra and the very weak phosphorescence signals.

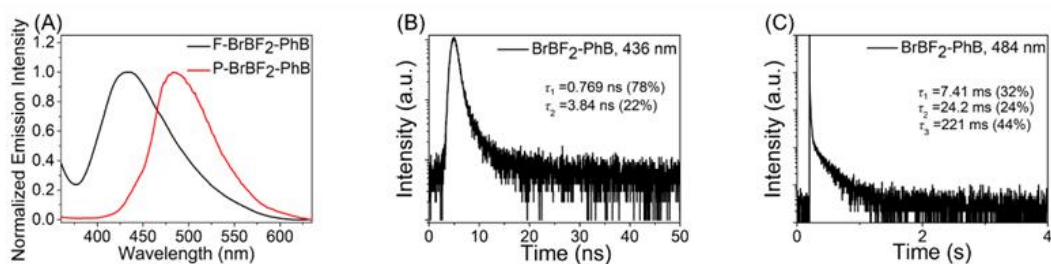

**Figure S17.** (A) Room-temperature fluorescence and phosphorescence spectra of BrBF<sub>2</sub>-PhB-0.05% powders. (B) Room-temperature fluorescence decay of BrBF<sub>2</sub>-PhB-0.05% monitored at 436 nm. (C) Room-temperature phosphorescence decay of BrBF<sub>2</sub>-PhB-0.05% monitored 484 nm.

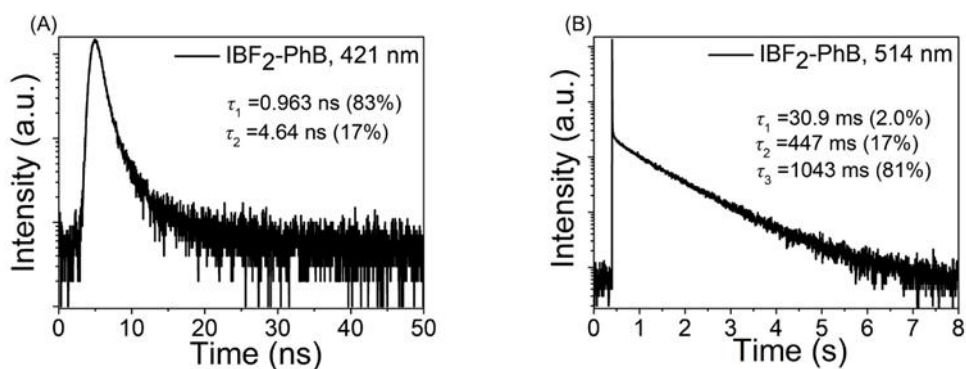

**Figure S18.** (A) Room-temperature fluorescence decay of IBF<sub>2</sub>-PhB-0.05% monitored at 421 nm. (B) Room-temperature phosphorescence decay of IBF<sub>2</sub>-PhB-0.05% monitored at 514 nm. This is also a repeated experiment that starts from material preparation and phosphorescence lifetime measurements. In this repeated experiment, a new IBF<sub>2</sub>-PhB-0.05% sample was prepared to show afterglow properties and then the phosphorescence decay profile of this sample was recorded.

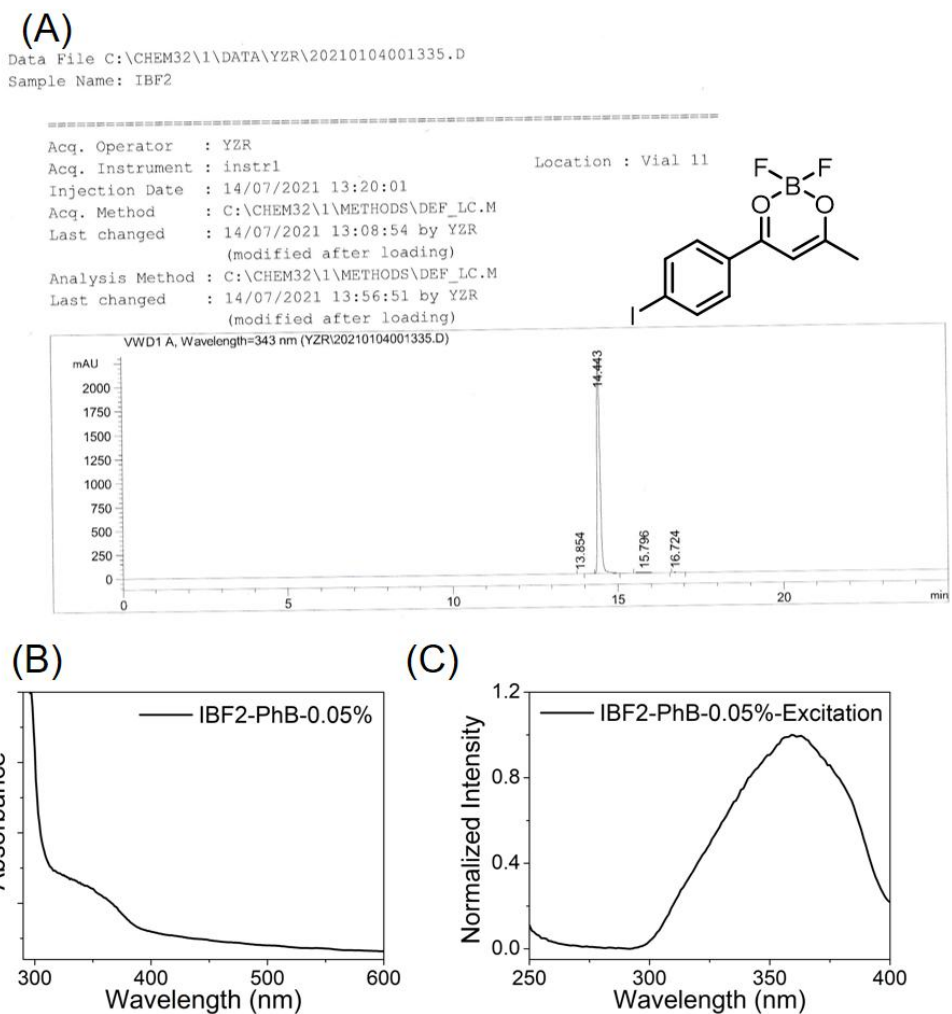

**Figure S19.** (A) HPLC results of the IBF<sub>2</sub> compound. (B) UV-Vis spectra and (C) excitation spectra of IBF<sub>2</sub>-PhB-0.05% afterglow materials. In the present study, the IBF<sub>2</sub> compounds are purified by careful column chromatography followed by three cycles of recrystallization in spectroscopic grade dichloromethane/hexane. HPLC results show that the IBF<sub>2</sub> compounds possess high purity. It has been reported that isomeric impurity mechanism (*Nat. Mater.* 2021, **20**, 175) can lead to the emergency of room-temperature organic afterglow in carbazole systems. Retarded charge recombination between photo-generated radical cations and radical anions is responsible for the room-temperature afterglow behaviors. In the present study, IBF<sub>2</sub> powders alone show no room-temperature afterglow. For the IBF<sub>2</sub>-PhB-0.05% afterglow materials at such a low doping concentration, since the IBF<sub>2</sub> molecules and the possible impurities are well separated by PhB matrices, charge separation and recombination processes between IBF<sub>2</sub> molecules and the possible impurities are statistically negligible. If the possible impurities show afterglow properties after doping into PhB matrices, the afterglow emission intensity would be very weak because the doping concentration of the possible impurities in organic matrices is very low (1 ppm or even lower). The above experiments and analyses can rule out the possibility that the room-temperature afterglow is originated from some impurities. The excitation spectra of IBF<sub>2</sub>-PhB-0.05% samples have been found to show peaks with similar wavelengths as their UV-vis absorption spectra. Therefore, the afterglow properties of IBF<sub>2</sub>-PhB-0.05% samples can be exclusively attributed to the phosphorescence decay of IBF<sub>2</sub> molecules dispersed in PhB matrices.

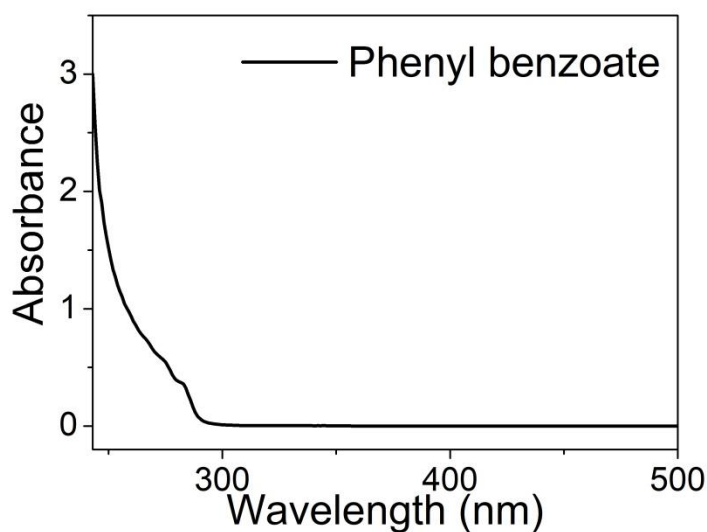

**Figure S20.** UV-Vis spectra of the melt-cast film of phenyl benzoate matrices. In the literature, triplet-to-triplet excited state energy transfer from organic matrices to luminescent dopants has also been reported to give rise to organic afterglow behaviors in two-component systems (*CCS Chem.* 2020, **2**, 1391). In these studies, efficient afterglow properties can only be observed when the organic matrices are well excited. The PhB matrices show negligible UV-vis absorption at 365 nm or longer wavelengths. The present IBF<sub>2</sub>-PhB-0.05% samples can be excited at 365 nm UV to exhibit significant afterglow properties, so triplet-to-triplet excited state energy transfer is not necessary for the emergency of afterglow properties in the present study. In the present study, although the IBF<sub>2</sub>-PhB-0.05% samples possess a relatively large  $\Delta E_{ST}$  of 0.54 eV ( $S_1$  level, 2.95 eV;  $T_1$  level, 2.41 eV), the heavy atom effect of the iodine substituents can enhance intersystem crossing for the population of the triplet excited states in IBF<sub>2</sub>-PhB-0.05% samples. The afterglow properties of IBF<sub>2</sub>-PhB-0.05% samples can be exclusively attributed to the phosphorescence decay of molecularly dispersed IBF<sub>2</sub> triplet excited states in PhB matrices.

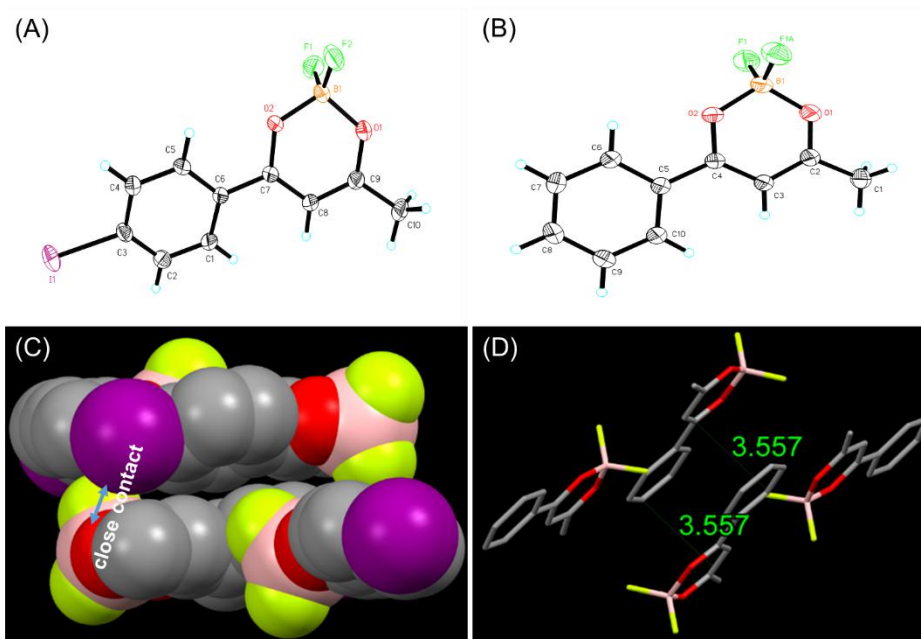

**Figure S21.** (A, C) Single-crystal structures of IBF<sub>2</sub>. Due to their relatively large sizes, the iodine atoms have close contact with the dioxaborine rings of the neighbouring IBF<sub>2</sub> molecules (C), which leads to the formation of external heavy atom effect in IBF<sub>2</sub> powders, as well as IBF<sub>2</sub>-PhB powders at high doping concentrations. (B, D) Single-crystal structures of HBF<sub>2</sub>. It is found that the HBF<sub>2</sub> molecules show  $\pi$ - $\pi$  stacking with an interplanar distance of 0.356 nm.

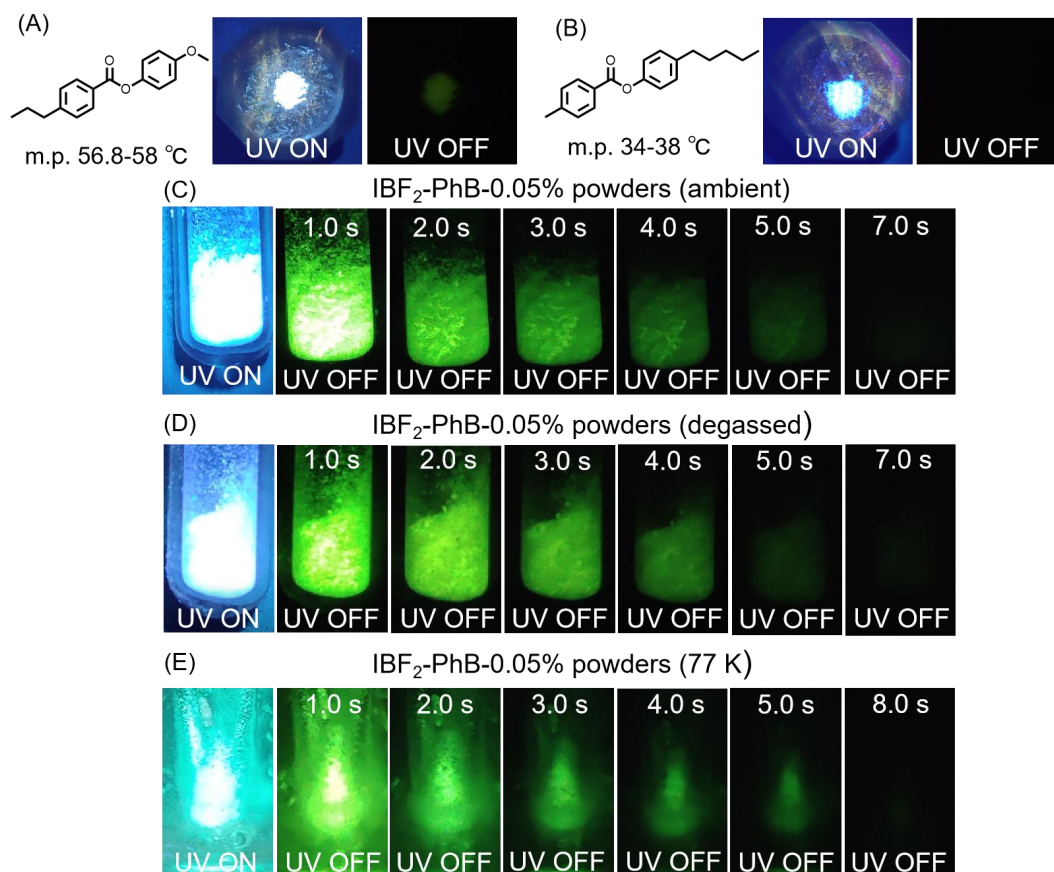

**Figure S22.** (A) Chemical structure of 4-methoxyphenyl 4-propylbenzoate and photographs of the IBF<sub>2</sub>-4-methoxyphenyl 4-propylbenzoate-0.05% samples under 365 nm UV light and after removal of 365 nm UV light. (B) Chemical structure of 4-pentylphenyl 4-methylbenzoate and IBF<sub>2</sub>-4-methoxyphenyl 4-propylbenzoate-0.05% samples under 365 nm UV light and after removal of 365 nm UV light. (C-E) Photographs of IBF<sub>2</sub>-PhB-0.05% powders at ambient conditions (C), in degassed conditions (D) and at 77 K (E) under 365 nm UV light and after removal of 365 nm UV light. PhB derivatives such as 4-methoxyphenyl 4-propylbenzoate and 4-pentylphenyl 4-methylbenzoate have been tested as organic matrix for the preparation of IBF<sub>2</sub>-matrix samples. These IBF<sub>2</sub>-matrix samples show insignificant afterglow at ambient conditions. When compared to PhB matrices, these PhB derivatives possess lower melting points and can only provide microenvironments with less rigidity. It is also found that the afterglow durations of the IBF<sub>2</sub>-PhB-0.05% materials at 77 K where nonradiative decay is frozen are only slightly longer than those at ambient conditions. These experiments suggest that the rigid microenvironments provided by PhB organic matrices can restrict the nonradiative deactivation of IBF<sub>2</sub> triplet excited states at ambient conditions. The afterglow properties of the IBF<sub>2</sub>-PhB-0.05% materials in degassed conditions have also been tested. It has also been found that the IBF<sub>2</sub>-PhB-0.05% materials in degassed conditions possess similar afterglow brightness and duration as the materials at ambient conditions. These suggest that the PhB can protect the IBF<sub>2</sub> triplet excited states from oxygen quenching by the encapsulation. For the IBF<sub>2</sub>-PhB-0.05% materials at ambient conditions, the rate constant of phosphorescence decay ( $k_p$ ) can be estimated from their phosphorescence lifetimes to be on the order of 1 s<sup>-1</sup>. The  $k_{nr}$  values are dependent on the environments of IBF<sub>2</sub> triplet excited states. At 77 K, the  $k_{nr}$  is much smaller than  $k_p$  since the molecular motion at low temperature can be largely suppressed. It is found that the afterglow durations of the IBF<sub>2</sub>-PhB-0.05% materials at 77 K are slightly longer than those at ambient condition. These suggest that the  $k_{nr}$  is much smaller than  $k_p$  because the rigid PhB matrices can largely restrict intramolecular motions of the IBF<sub>2</sub> triplet excited states even at room temperature. The insignificant difference of the afterglow durations between ambient conditions and degassed conditions suggest that the  $k_q$  with oxygen of the IBF<sub>2</sub>-PhB-0.05% materials should be smaller than  $k_p$  because of the PhB encapsulation. Without the presence of PhB matrices, the IBF<sub>2</sub>-matrix-0.05% samples (when 4-methoxyphenyl 4-propylbenzoate and 4-pentylphenyl 4-methylbenzoate are used as matrix) show insignificant afterglow, which suggest that the  $k_{nr} + k_q$  values are larger than  $k_p$  in these systems.



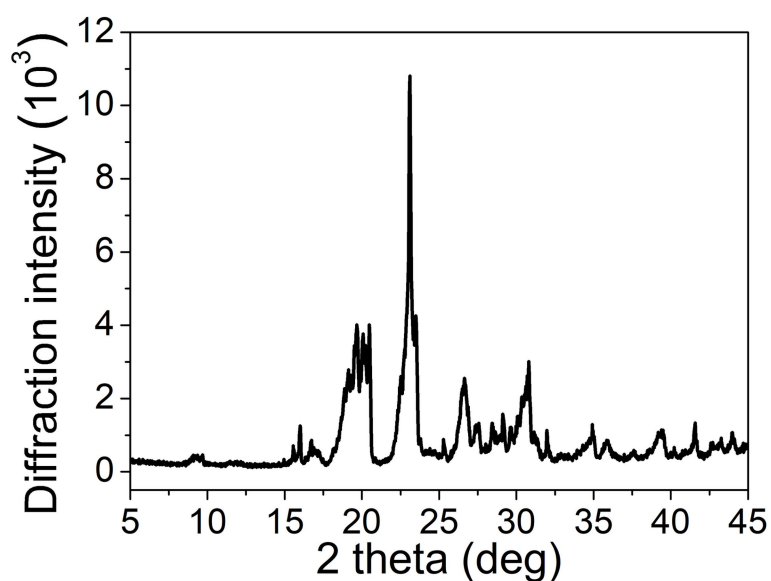

**Figure S23.** Powder XRD pattern of the melt-cast film of phenyl benzoate. Powder XRD shows crystalline structures of PhB, which indicate that the PhB matrices can provide rigid microenvironments for IBF<sub>2</sub> triplet excited states.

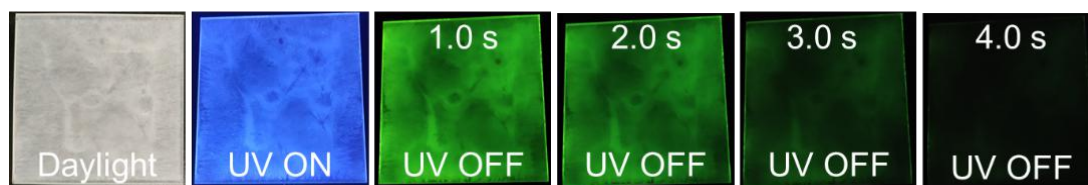

**Figure S24.** Photographs of IBF<sub>2</sub>-PhB-0.05% afterglow film sandwiched between two 10 cm × 10 cm quartz plates under daylight, 365 nm UV light and after removal of 365 nm UV light.

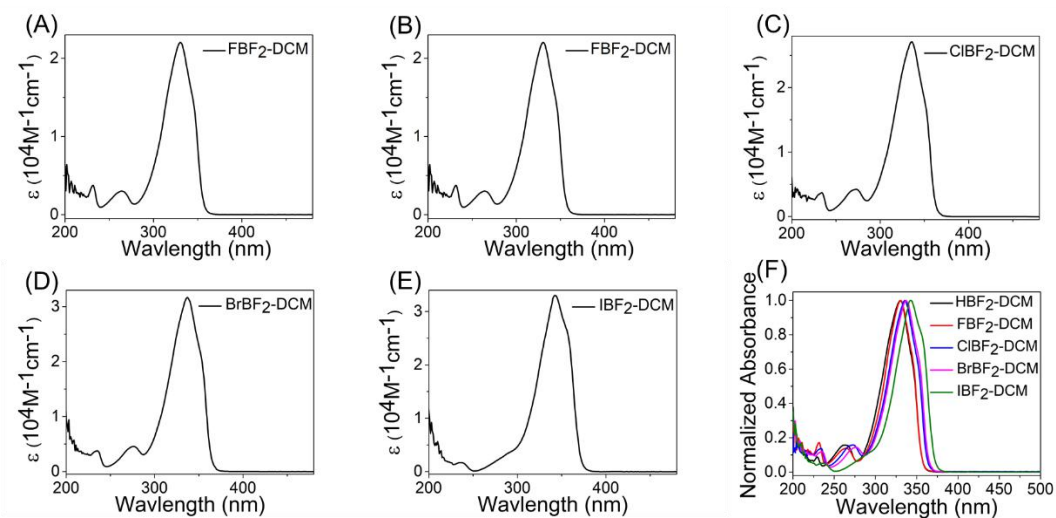

**Figure S25.** UV-Vis spectra of the BF<sub>2</sub>bdk compounds in dichloromethane solutions in the present study.

**Table S1.** Photophysical data of HBF<sub>2</sub>, FBF<sub>2</sub>, ClBF<sub>2</sub>, BrBF<sub>2</sub> and IBF<sub>2</sub> at room temperature.

| Entry                                                          | HBF <sub>2</sub><br>(DCM) | FBF <sub>2</sub><br>(DCM) | ClBF <sub>2</sub><br>(DCM) | BrBF <sub>2</sub><br>(DCM) | IBF <sub>2</sub><br>(DCM) |
|----------------------------------------------------------------|---------------------------|---------------------------|----------------------------|----------------------------|---------------------------|
| $\lambda_{\text{Abs}}$ (nm)                                    | 330                       | 330                       | 336                        | 337                        | 343                       |
| $\epsilon$ (10 <sup>4</sup> M <sup>-1</sup> cm <sup>-1</sup> ) | 2.51                      | 2.20                      | 2.71                       | 3.17                       | 3.30                      |

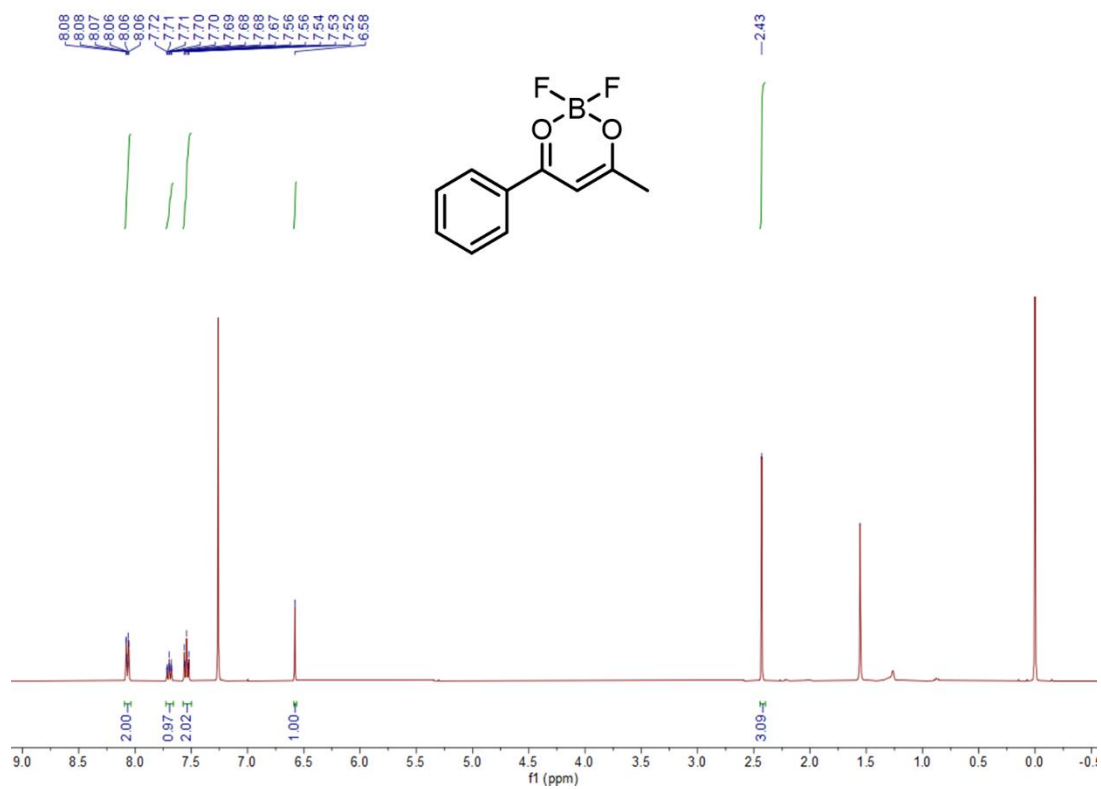

Figure S26. <sup>1</sup>H NMR spectrum of HBF<sub>2</sub>.

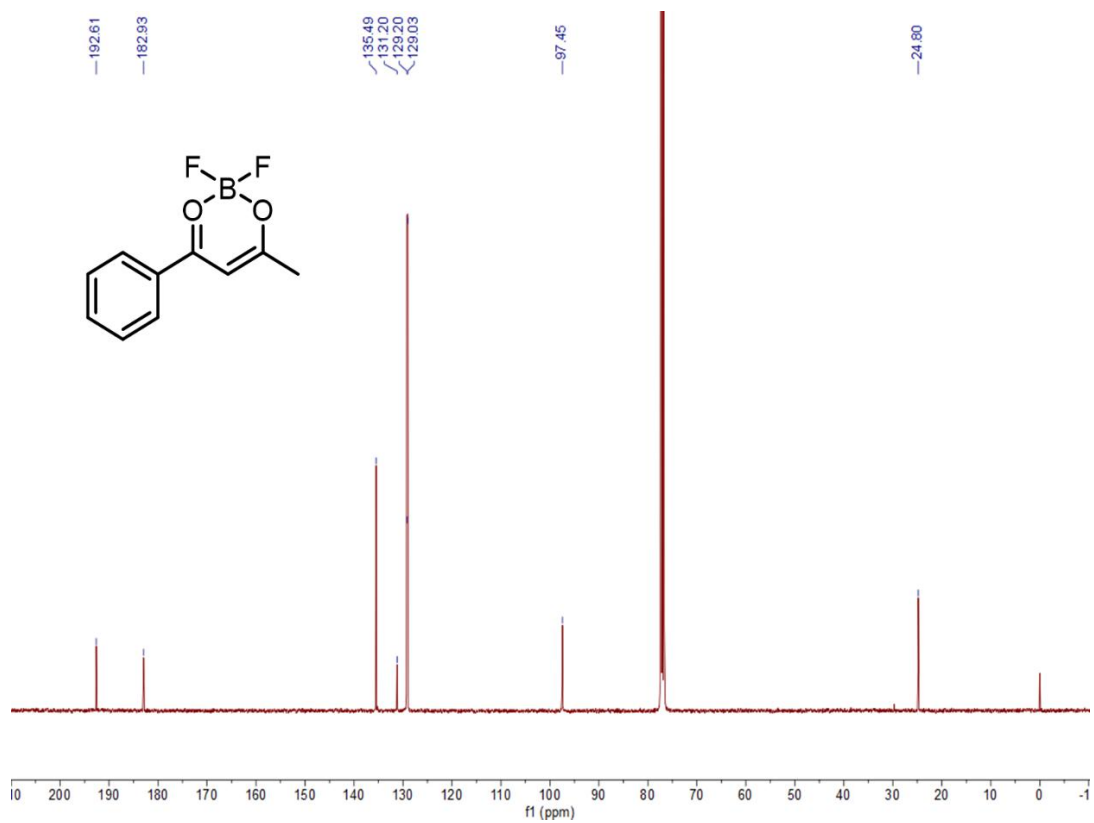

Figure S27. <sup>13</sup>C NMR spectrum of HBF<sub>2</sub>.

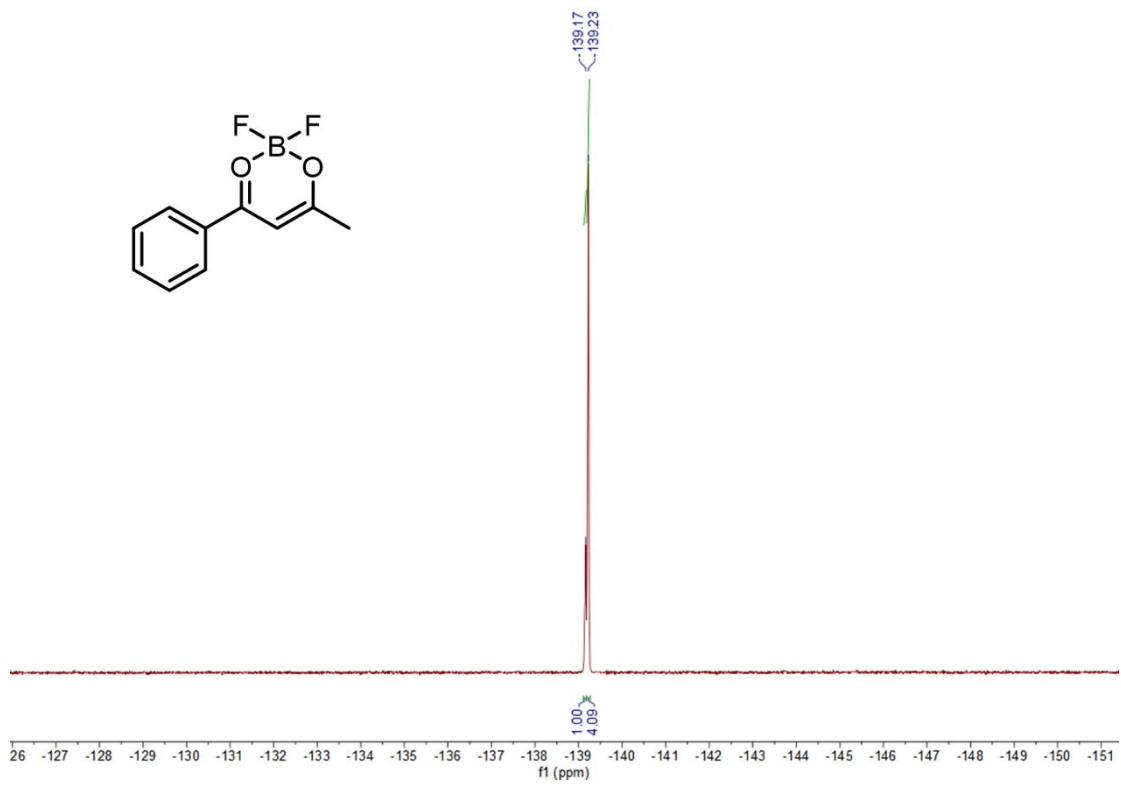

**Figure S28.** <sup>19</sup>F NMR spectrum of HBF<sub>2</sub>.

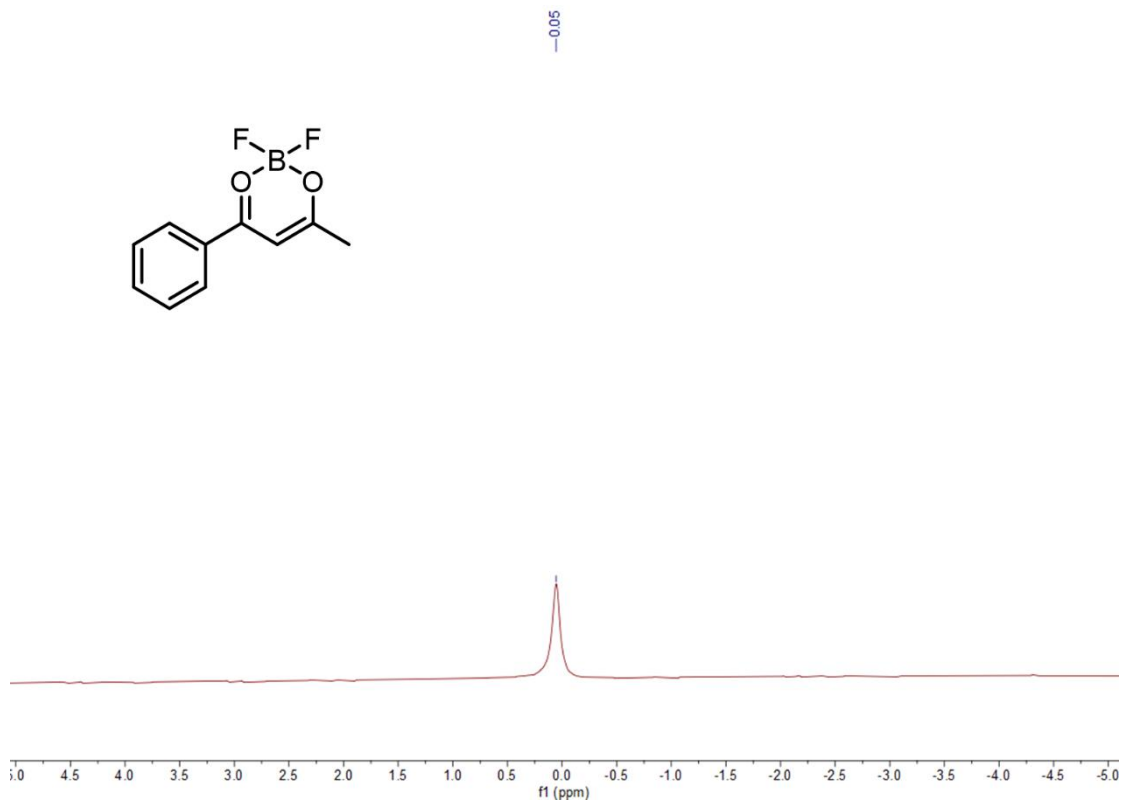

**Figure S29.** <sup>11</sup>B NMR spectrum of HBF<sub>2</sub>.

文件 : E:\5973N DATE\2021\04\0412\Snapshot\H210851.D  
操作员 :  
已采集 : 12 Apr 2021 13:37 , 使用采集方法 default.m  
仪器: 5973N  
样品名: 1  
其他信息 : 210  
样品瓶号: 1

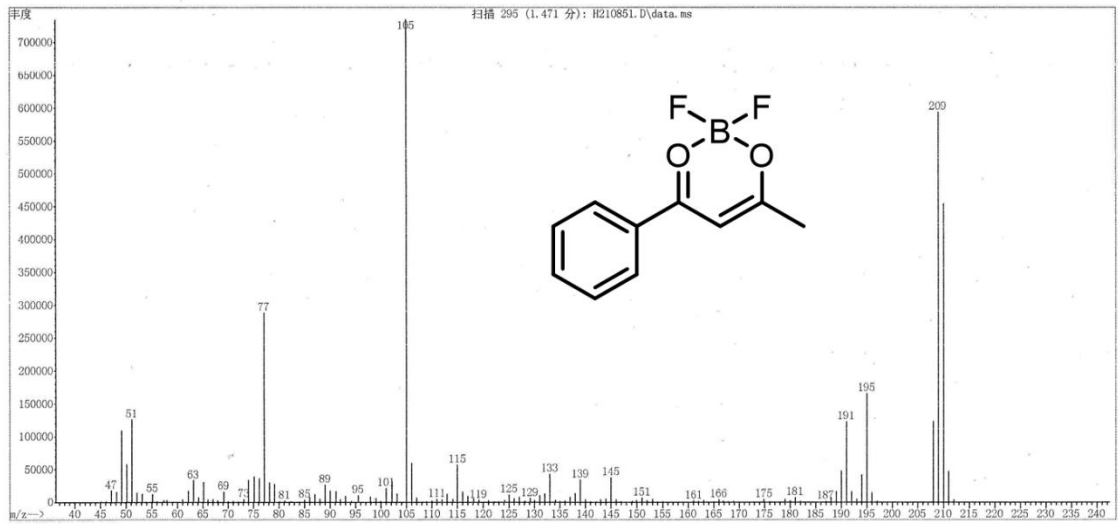

Figure S30. LRMS spectrum of HBF<sub>2</sub>.

National Center for Organic Mass Spectrometry in Shanghai  
Shanghai Institute of Organic Chemistry  
Chinese Academic of Sciences  
High Resolution FI-MS Report  
Low Resolution FI-MS Report

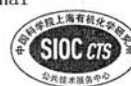

Instrument: JEOL-AccuTOF-GCv4G-GCT MS  
Operation Mode: FI Positive Ion Mode (Counter Electrode: 10000V)  
Card Serial Number: GCT-FI-T21-04-1487  
Sample Serial Number: 2020274-1  
Operator: Li Date: 2021/04/18

| m/z      | Theo. Mass | Delta (ppm) | RDB equiv. | Composition                                                                  |
|----------|------------|-------------|------------|------------------------------------------------------------------------------|
| 209.0690 | 209.0694   | -2.15       | 6.0        | C <sub>10</sub> H <sub>9</sub> O <sub>2</sub> <sup>10</sup> B F <sub>2</sub> |
|          | 209.0696   | -3.05       | 3.5        | C <sub>8</sub> H <sub>9</sub> N <sub>2</sub> F <sub>4</sub>                  |
|          | 209.0683   | 3.32        | 10.0       | C <sub>13</sub> H <sub>8</sub> O <sup>10</sup> B F                           |
|          | 209.0683   | 3.54        | 6.0        | C <sub>10</sub> H <sub>11</sub> O <sub>4</sub> N                             |
|          | 209.0681   | 4.30        | -5.0       | C <sub>2</sub> H <sub>12</sub> O <sub>4</sub> N F <sub>5</sub>               |

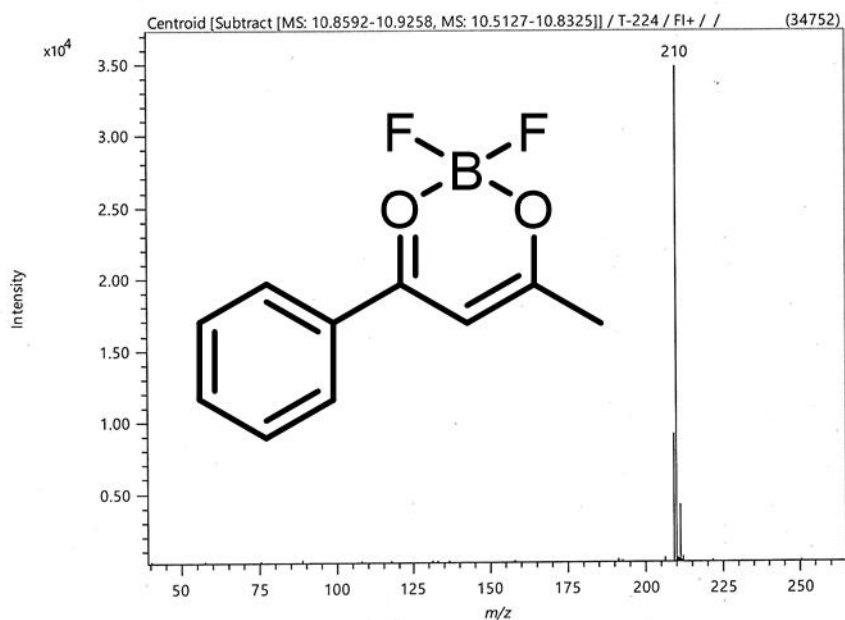

Figure S31. HRMS spectrum of HBF<sub>2</sub>.

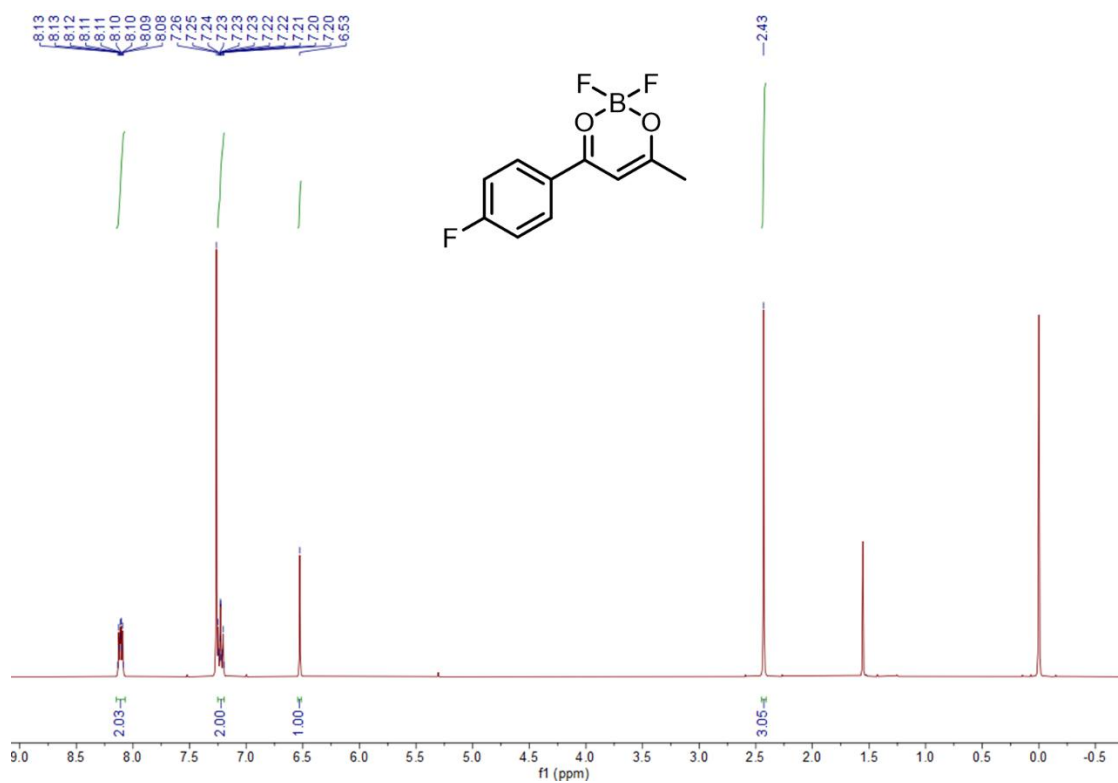

Figure S32. <sup>1</sup>H NMR spectrum of FBF<sub>2</sub>

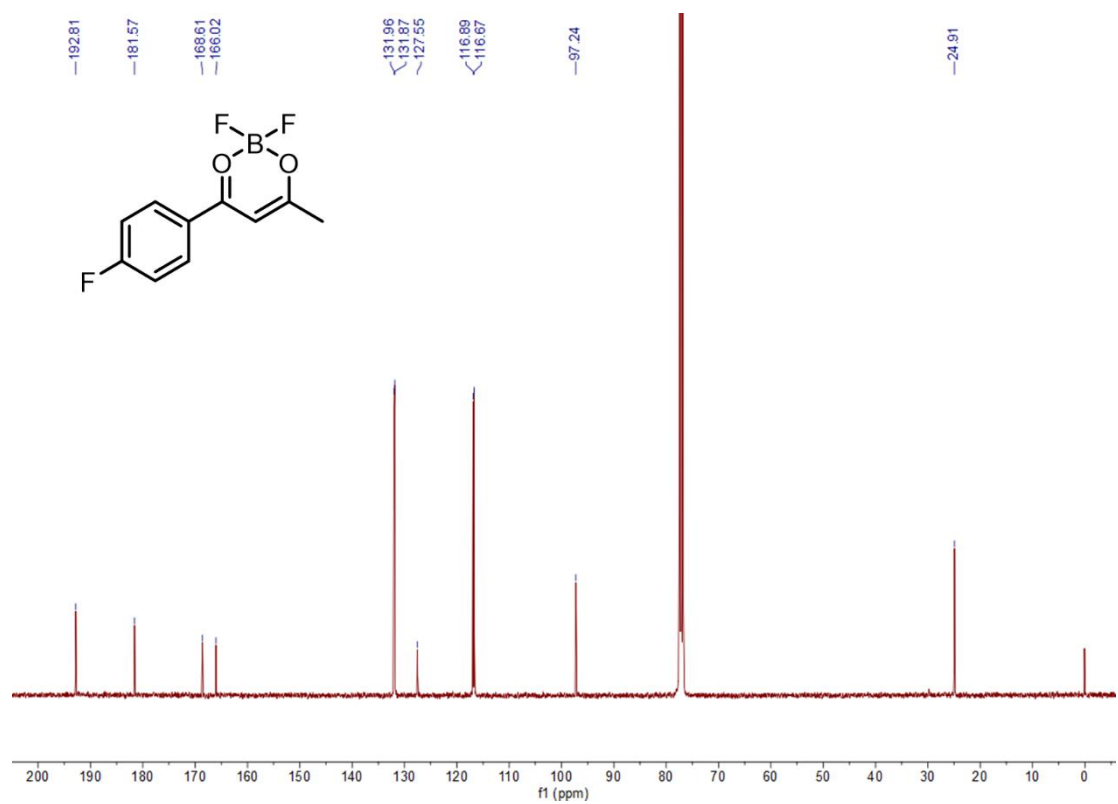

Figure S33. <sup>13</sup>C NMR spectrum of FBF<sub>2</sub>

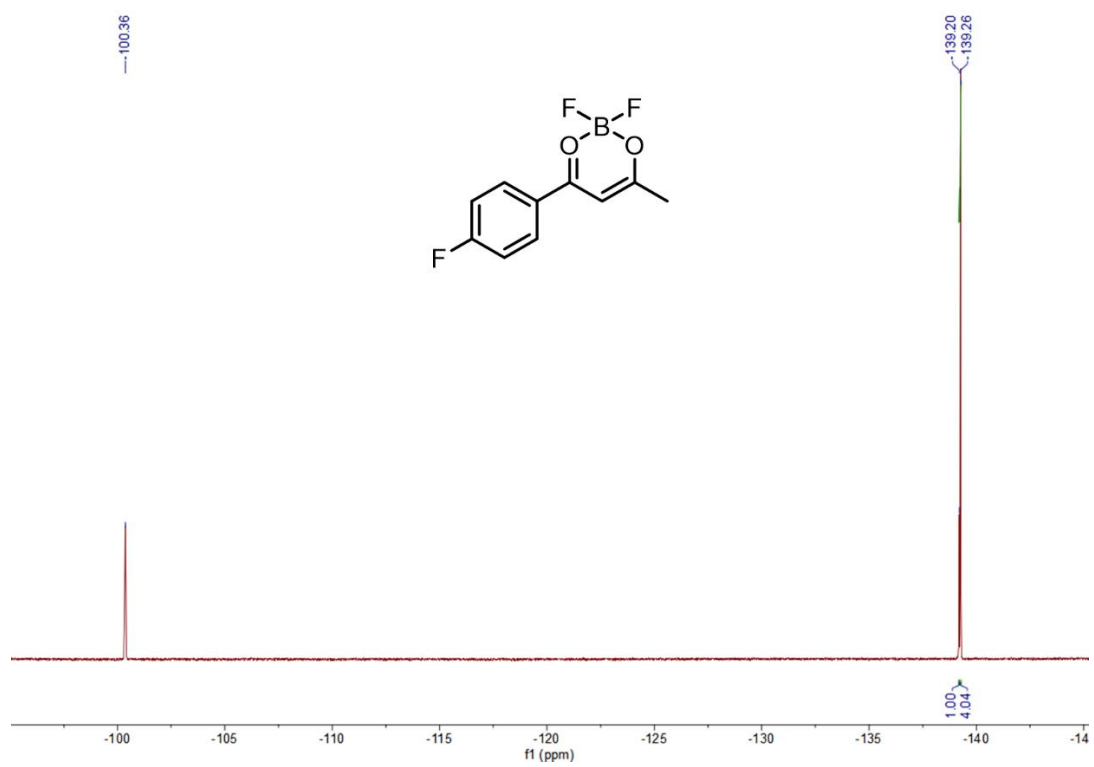

**Figure S34.** <sup>19</sup>F NMR spectrum of FBF<sub>2</sub>

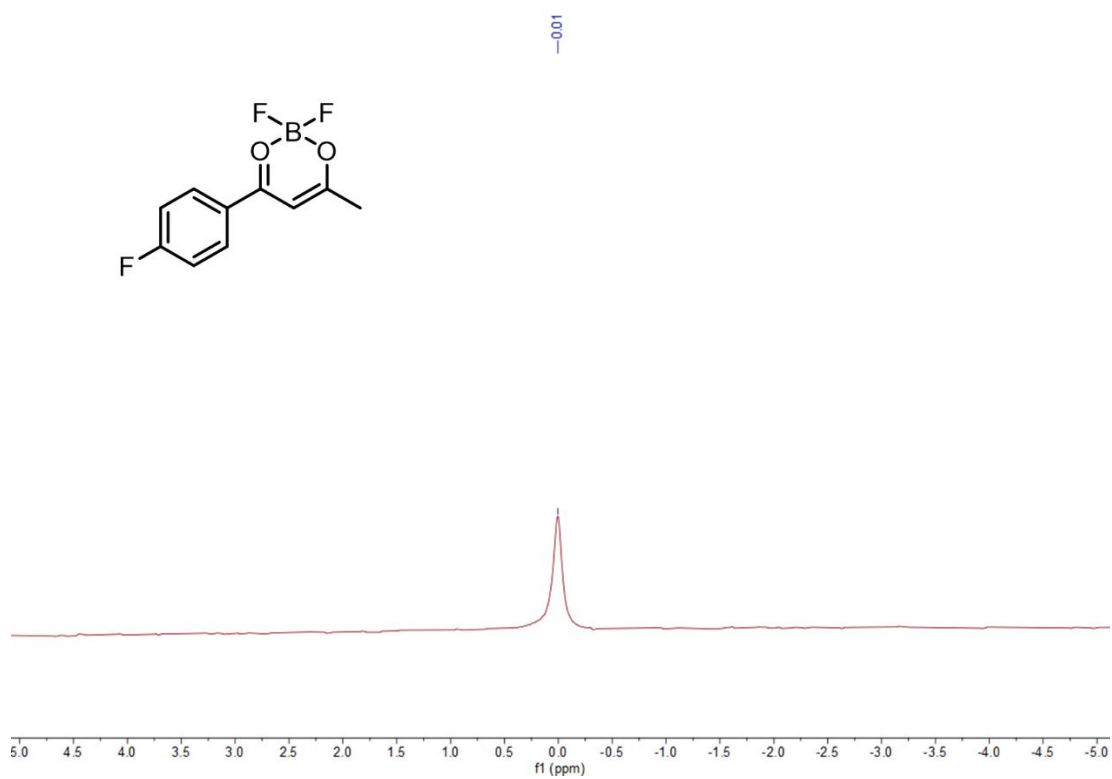

**Figure S35.** <sup>11</sup>B NMR spectrum of FBF<sub>2</sub>



文件 : E:\5973N DATE\2021104\0412\SnapshotH210852.D  
操作员 :  
已采集 : 12 Apr 2021 13:45 , 使用采集方法 default.m  
仪器: 5973N  
样品名: 2  
其他信息 : 228  
样品瓶号: 1

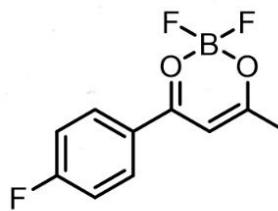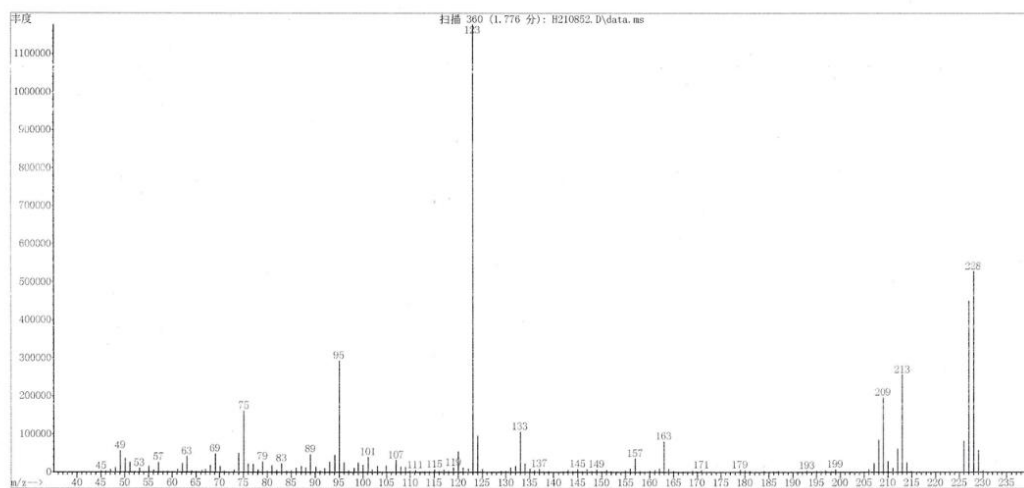

Figure S36. LRMS spectrum of FBF<sub>2</sub>.

National Center for Organic Mass Spectrometry in Shanghai  
Shanghai Institute of Organic Chemistry  
Chinese Academic of Sciences  
High Resolution FI-MS Report  
Low Resolution FI-MS Report

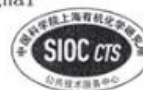

Instrument: JEDL-AccuTOF-GCv4G-GCT MS  
Operation Mode: FI Positive Ion Mode (Counter Electrode: 10000V)  
Card Serial Number: GCT-FI-T21-04-1488  
Sample Serial Number: 2020274-2  
Operator: Li Date: 2021/04/18

| m/z      | Theo. Mass | Delta (ppm) | RDB equiv. | Composition                                                                  |
|----------|------------|-------------|------------|------------------------------------------------------------------------------|
| 227.0597 | 227.0600   | -1.44       | 6.0        | C <sub>10</sub> H <sub>8</sub> O <sub>2</sub> <sup>10</sup> B F <sub>3</sub> |
|          | 227.0602   | -2.27       | 3.5        | C <sub>8</sub> H <sub>8</sub> N <sub>2</sub> F <sub>5</sub>                  |
|          | 227.0604   | -2.97       | 14.5       | C <sub>16</sub> H <sub>7</sub> N <sub>2</sub>                                |
|          | 227.0589   | 3.59        | 10.0       | C <sub>13</sub> H <sub>7</sub> O <sup>10</sup> B F <sub>2</sub>              |
|          | 227.0588   | 3.80        | 6.0        | C <sub>10</sub> H <sub>10</sub> O <sub>4</sub> N F                           |

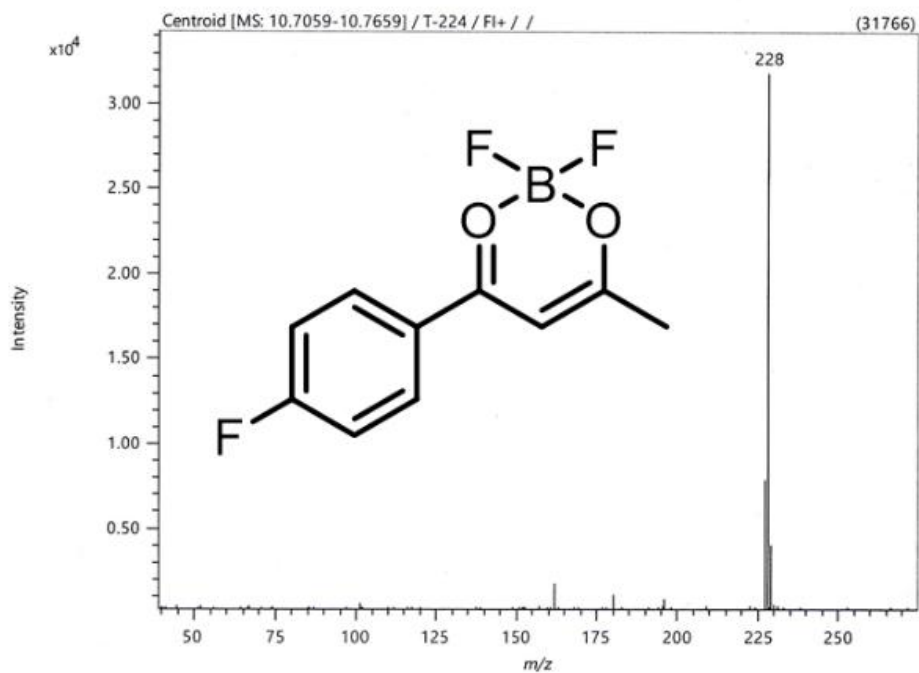

Figure S37. HRMS spectrum of FBF<sub>2</sub>

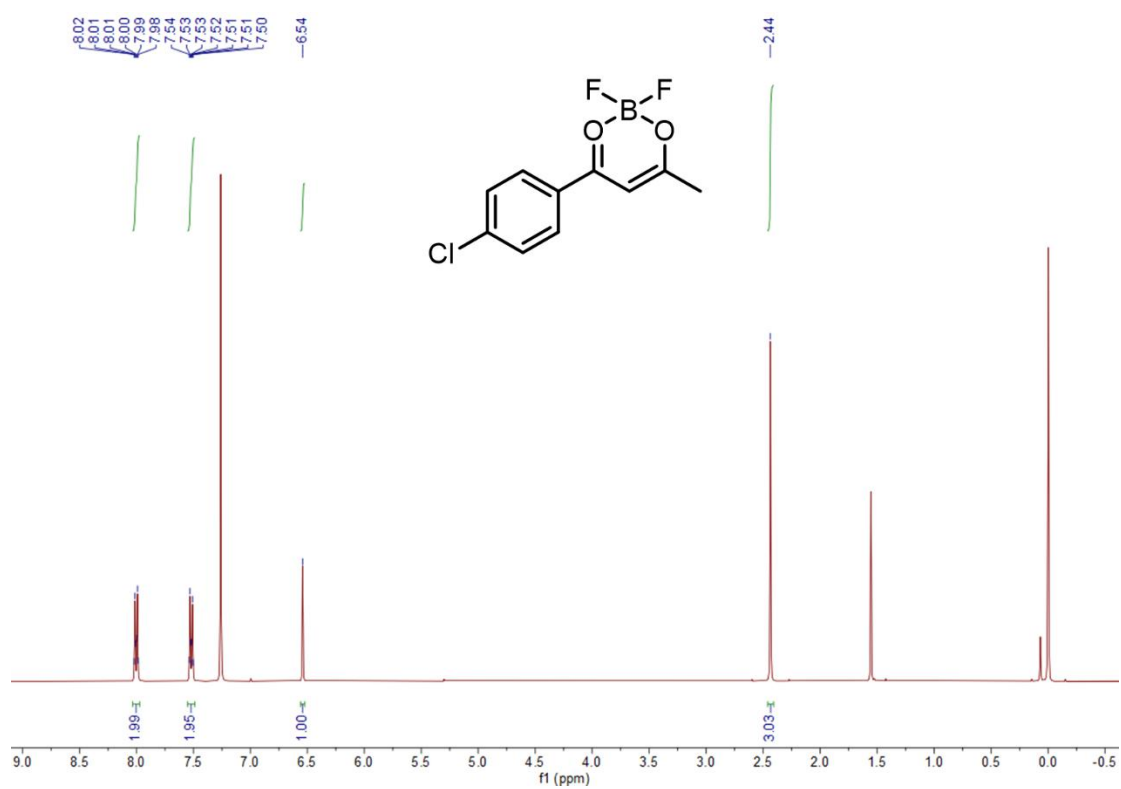

Figure S38. <sup>1</sup>H NMR spectrum of CIBF<sub>2</sub>

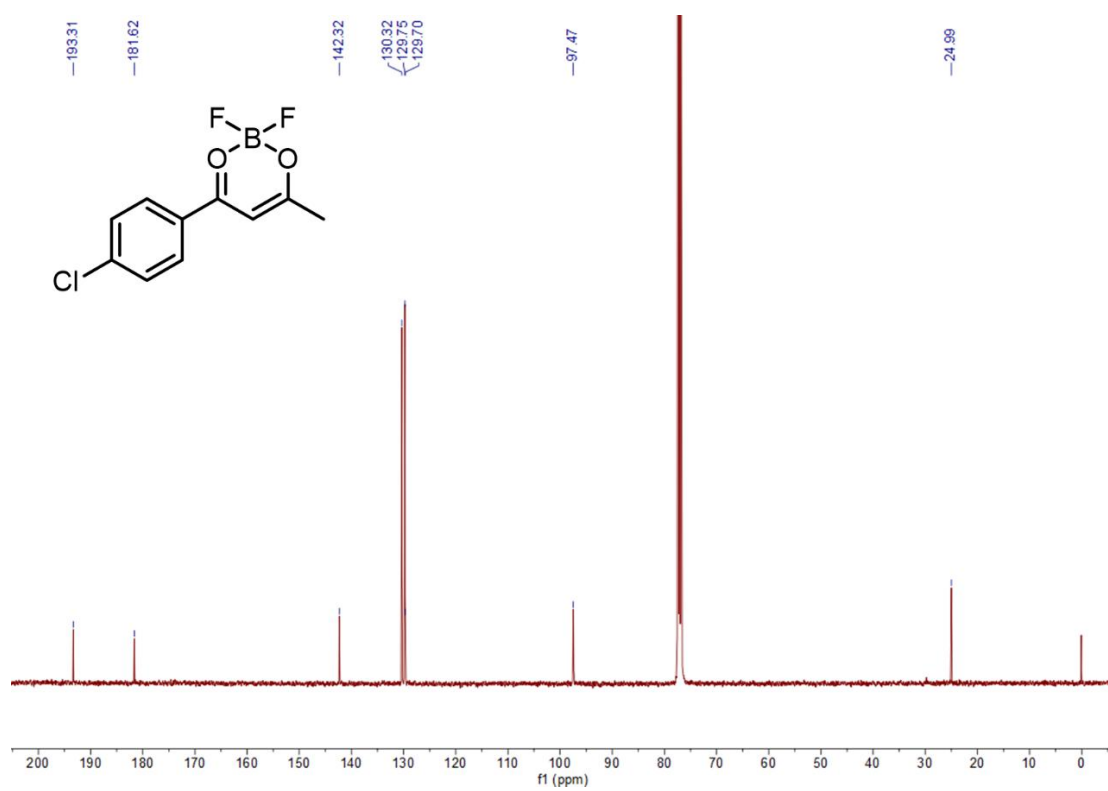

Figure S39. <sup>13</sup>C NMR spectrum of CIBF<sub>2</sub>

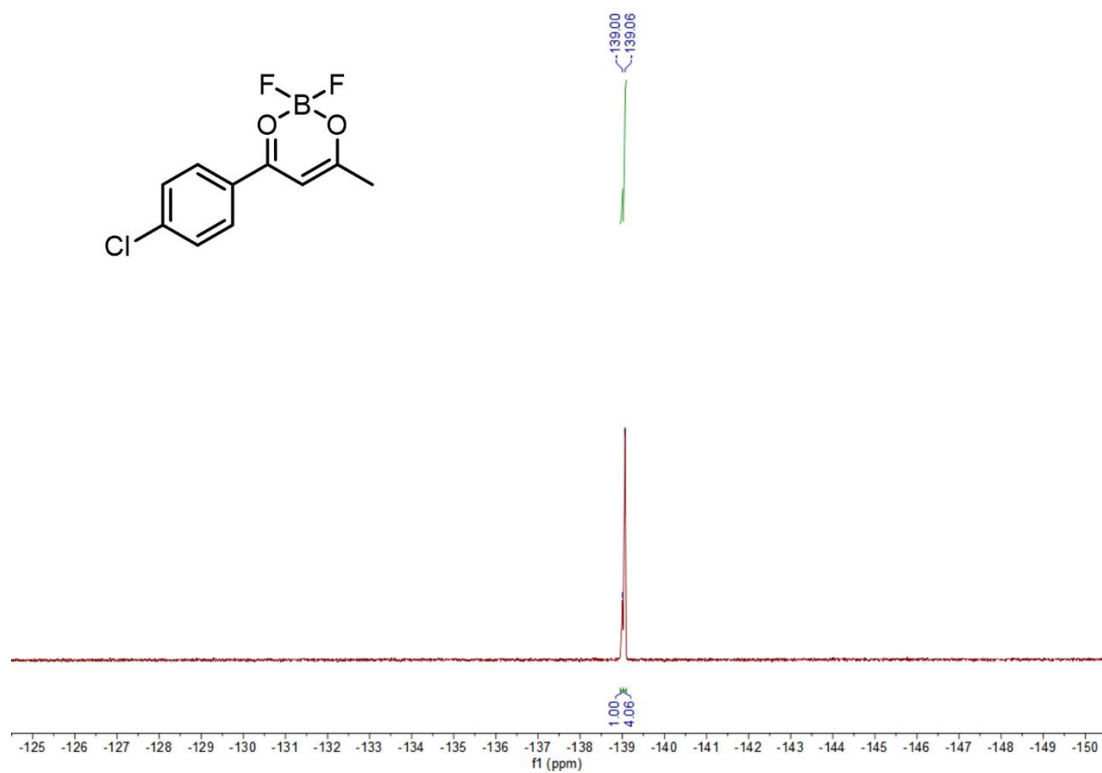

**Figure S40.** <sup>19</sup>F NMR spectrum of CIBF<sub>2</sub>

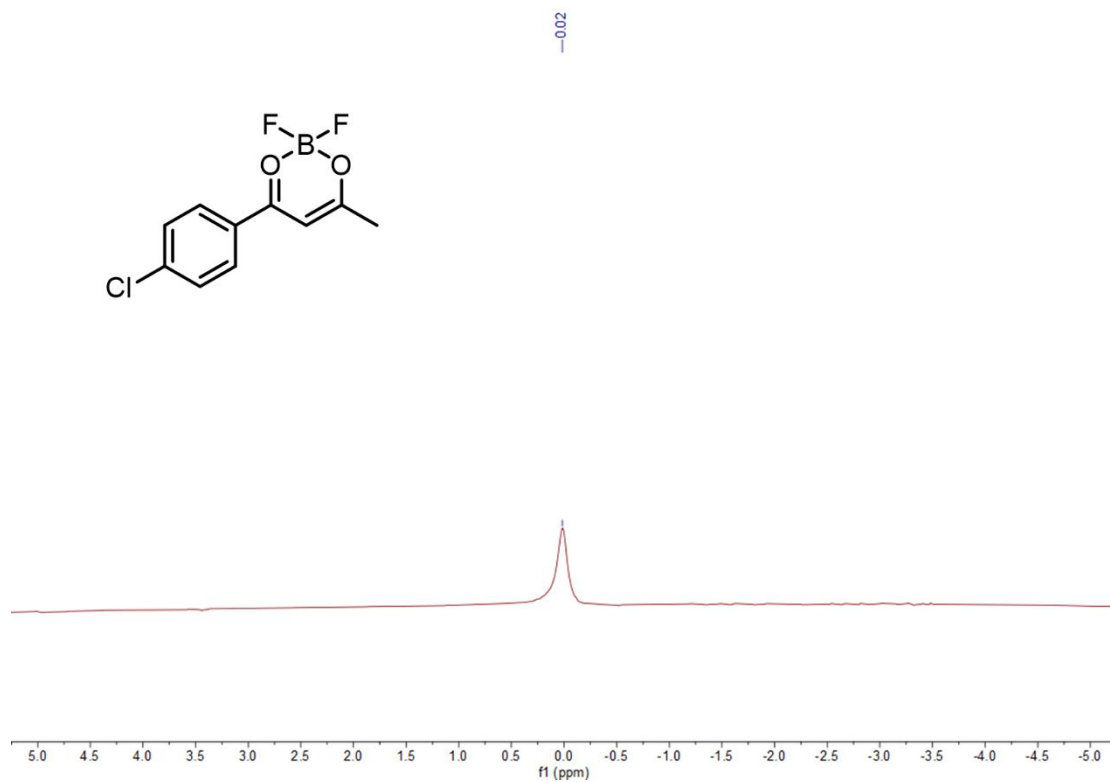

**Figure S41.** <sup>11</sup>B NMR spectrum of CIBF<sub>2</sub>

文件 : E:\5973N DATE\2021\04\12\Snapshot\H210853.D  
 操作员 :  
 已采集 : 12 Apr 2021 13:51 , 使用采集方法 default.m  
 仪器: 5973N  
 样品名: 3  
 其他信息 : 244  
 样品瓶号: 1

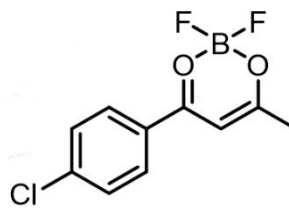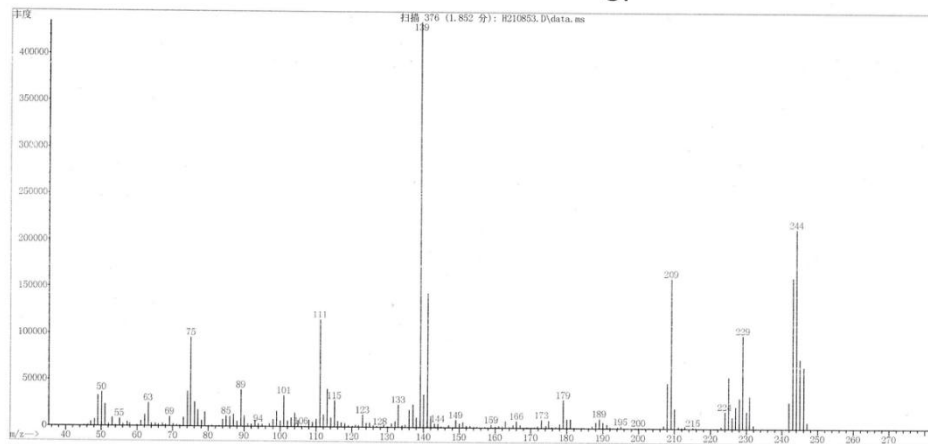

Figure S42. LRMS spectrum of CIBF<sub>2</sub>.

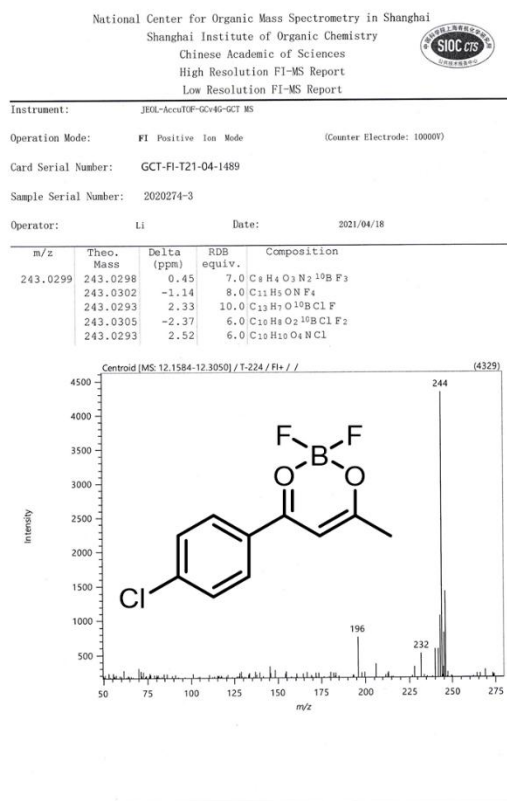

Figure S43. HRMS spectrum of CIBF<sub>2</sub>.

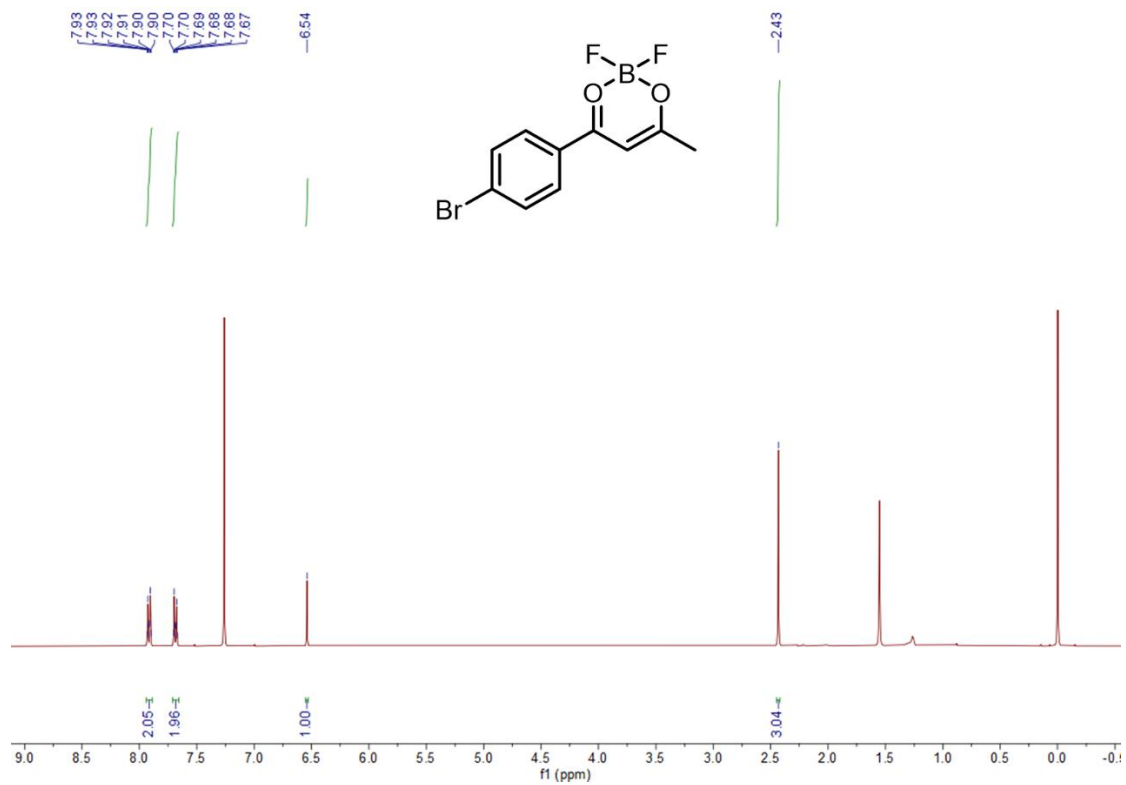

Figure S44. <sup>1</sup>H NMR spectrum of BrBF<sub>2</sub>

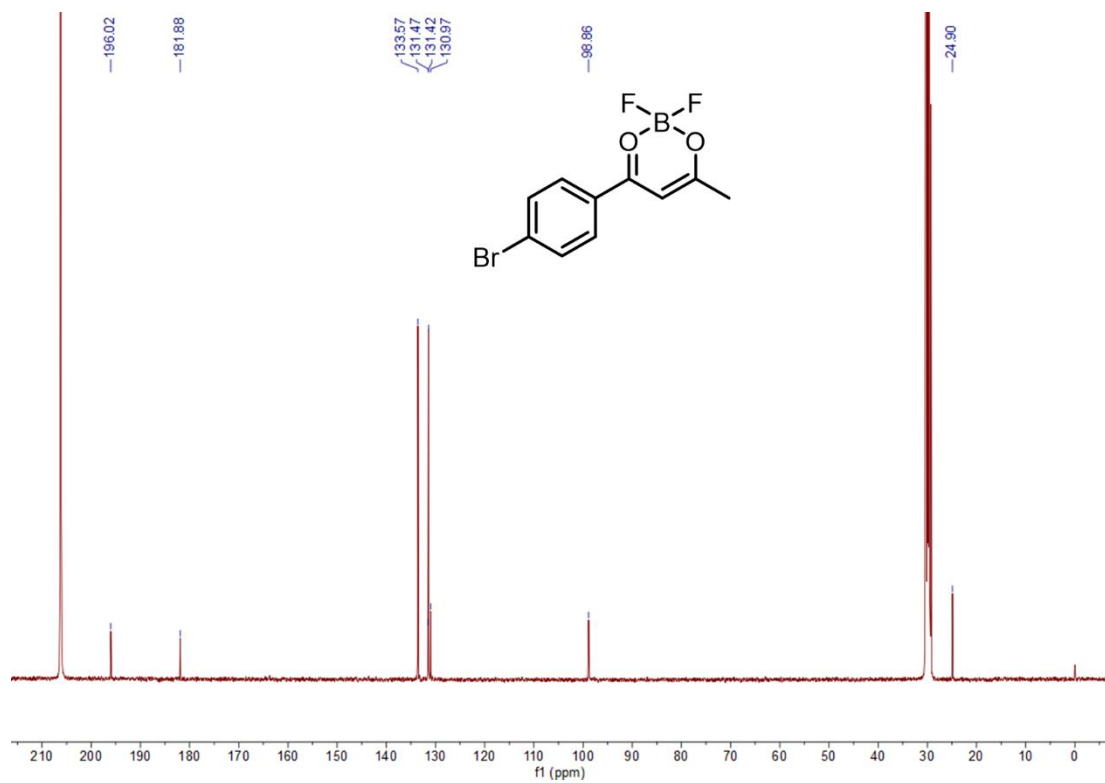

Figure S45. <sup>13</sup>C NMR spectrum of BrBF<sub>2</sub>

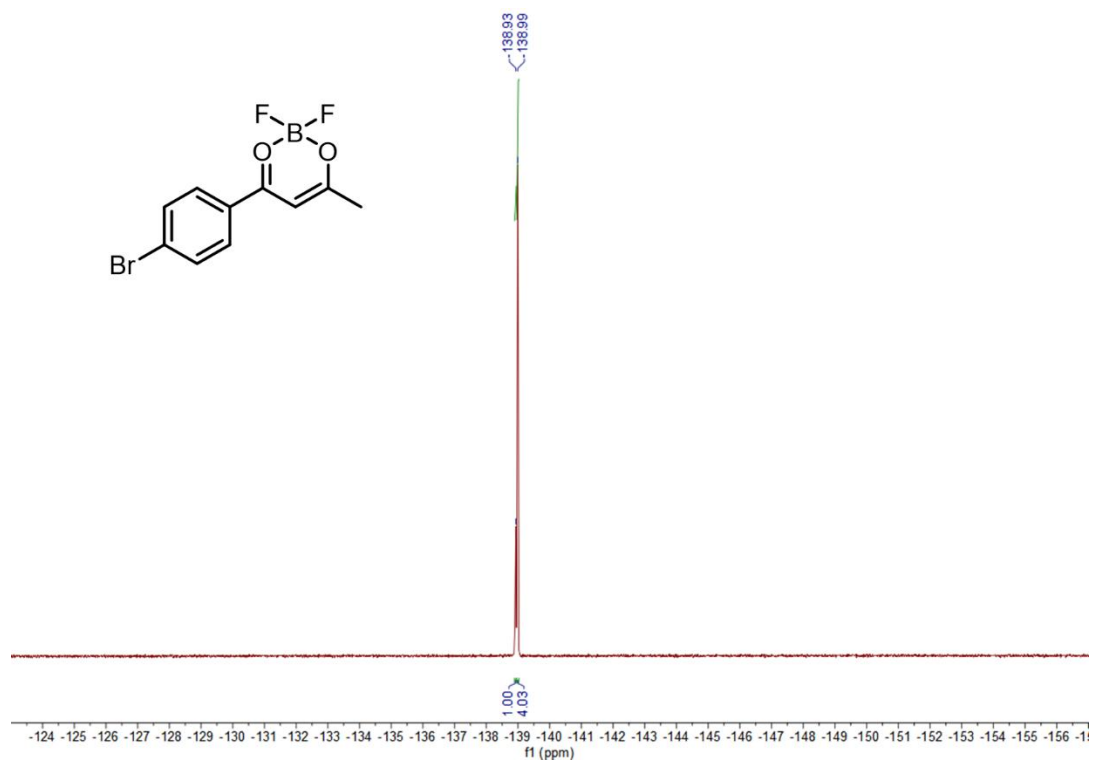

**Figure S46.**  $^{19}\text{F}$  NMR spectrum of  $\text{BrBF}_2$

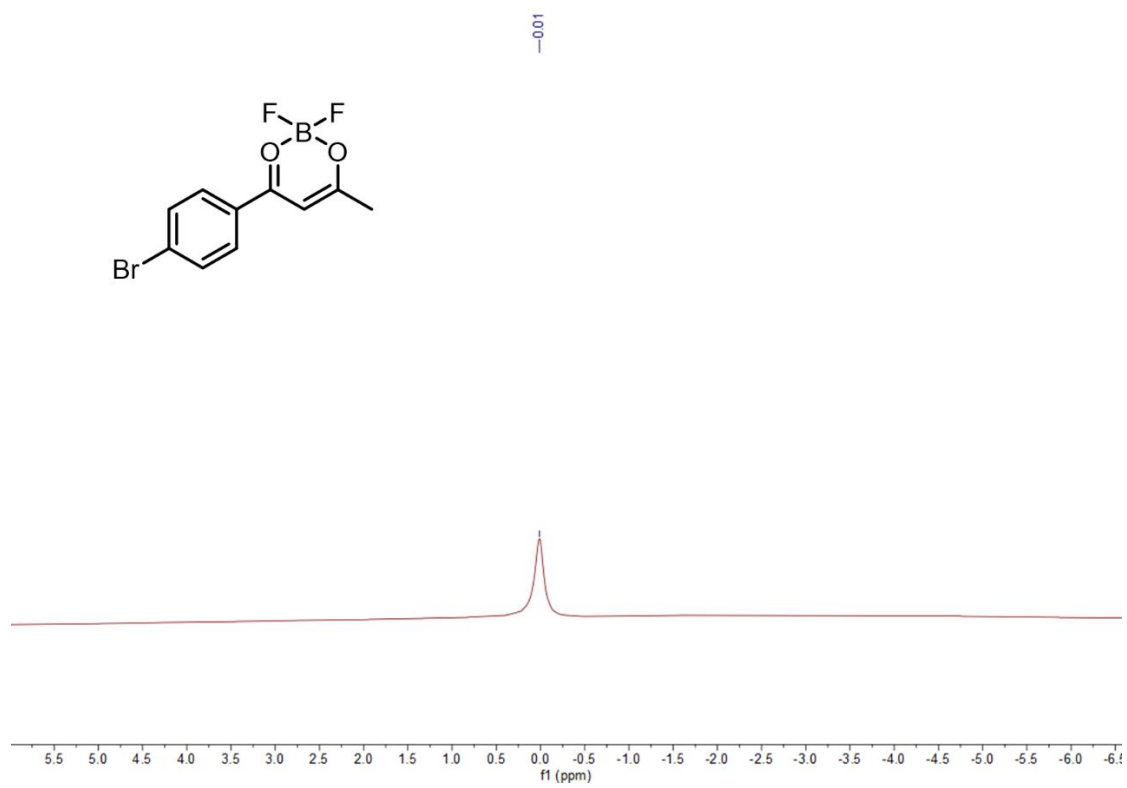

**Figure S47.**  $^{11}\text{B}$  NMR spectrum of  $\text{BrBF}_2$

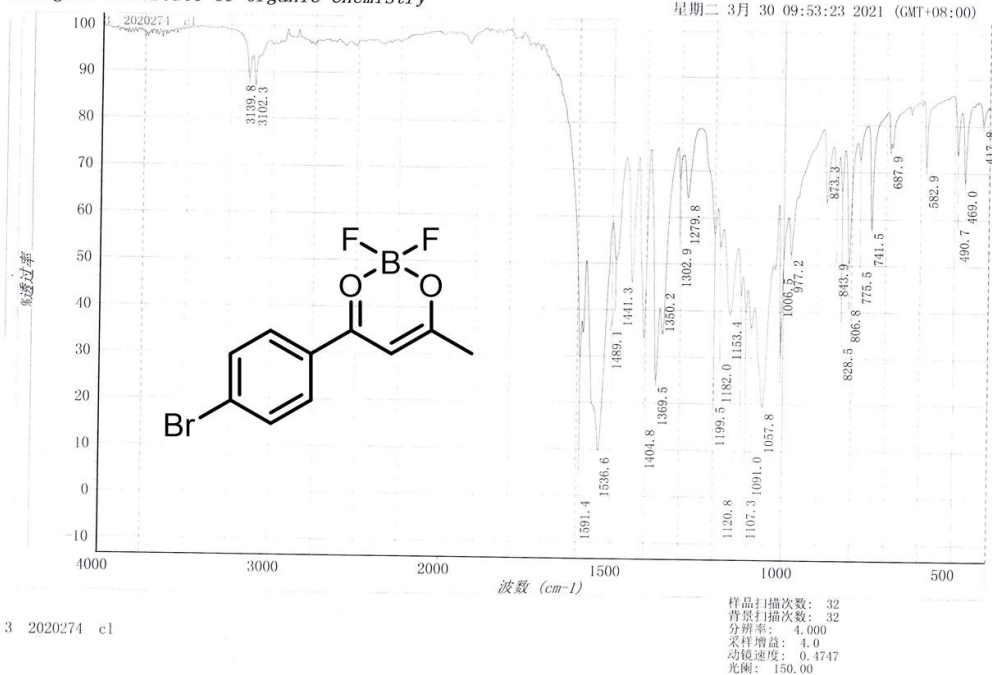Figure S48. FT-IR spectrum of BrBF<sub>2</sub>

文件 : E:\5973N date\2021\04\04\H210854.D  
操作员 :  
已采集 : 12 Apr 2021 13:58 , 使用采集方法 default.m  
仪器: 5973N  
样品名: 4  
其他信息 : 289  
样品瓶号: 1

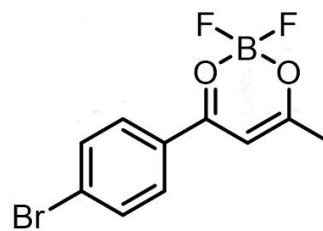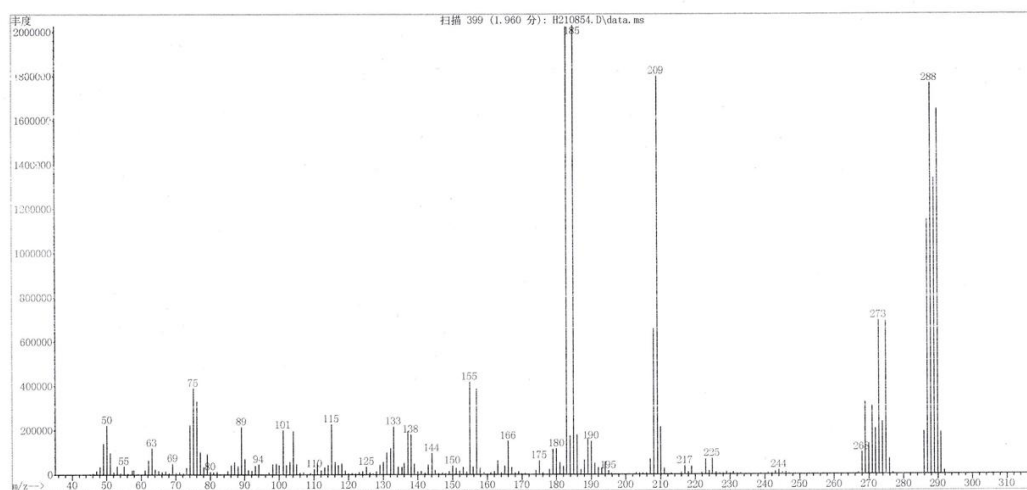Figure S49. LRMS spectrum of BrBF<sub>2</sub>



National Center for Organic Mass Spectrometry in Shanghai  
 Shanghai Institute of Organic Chemistry  
 Chinese Academic of Sciences  
 High Resolution FI-MS Report  
 Low Resolution FI-MS Report

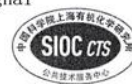

Instrument: JEOL-AccuTOF-GCv4G-GCT MS  
 Operation Mode: FI Positive Ion Mode (Counter Electrode: 10000V)  
 Card Serial Number: GCT-FI-T21-04-1491  
 Sample Serial Number: 2020274-4  
 Operator: Li Date: 2021/04/18

| m/z      | Theo. Mass | Delta (ppm) | RDB equiv. | Composition                                                                     |
|----------|------------|-------------|------------|---------------------------------------------------------------------------------|
| 286.9795 | 286.9799   | -1.49       | -10.0      | H <sub>20</sub> O <sub>2</sub> <sup>10</sup> B Br F I                           |
|          | 286.9800   | -1.61       | 6.0        | C <sub>10</sub> H <sub>8</sub> O <sub>2</sub> <sup>10</sup> B Br F <sub>2</sub> |
|          | 286.9800   | -1.74       | -5.0       | C <sub>2</sub> H <sub>11</sub> ON F <sub>5</sub> I                              |
|          | 286.9789   | 2.24        | -1.0       | C <sub>5</sub> H <sub>10</sub> N F <sub>4</sub> I                               |
|          | 286.9802   | -2.27       | 3.5        | C <sub>8</sub> H <sub>8</sub> N <sub>2</sub> Br F <sub>4</sub>                  |

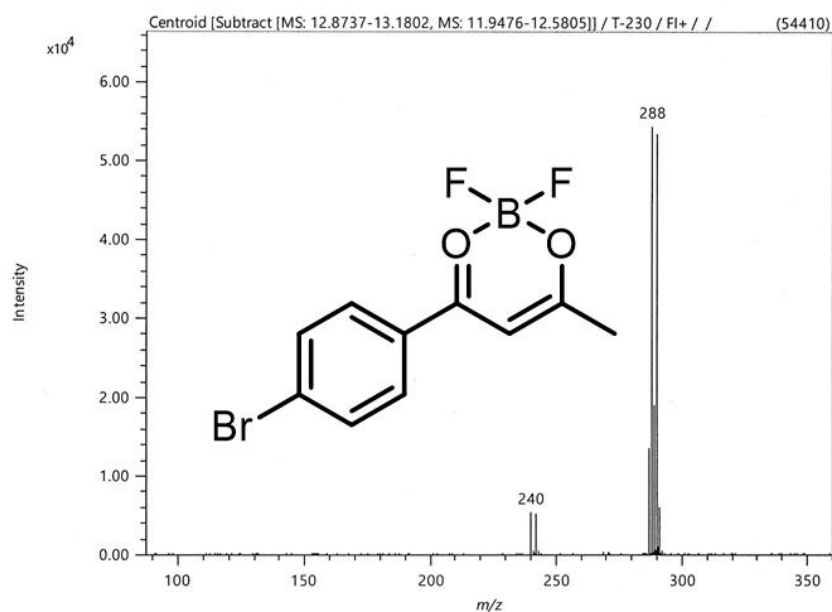

Figure S50. HRMS spectrum of BrBF<sub>2</sub>

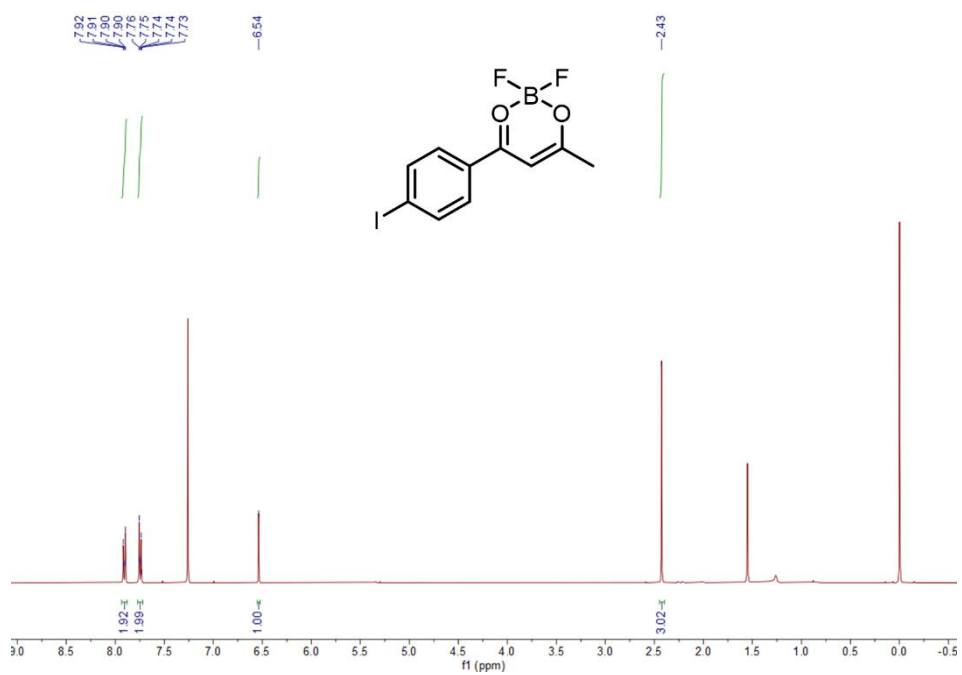

**Figure S51.** <sup>1</sup>H NMR spectrum of IBF<sub>2</sub>

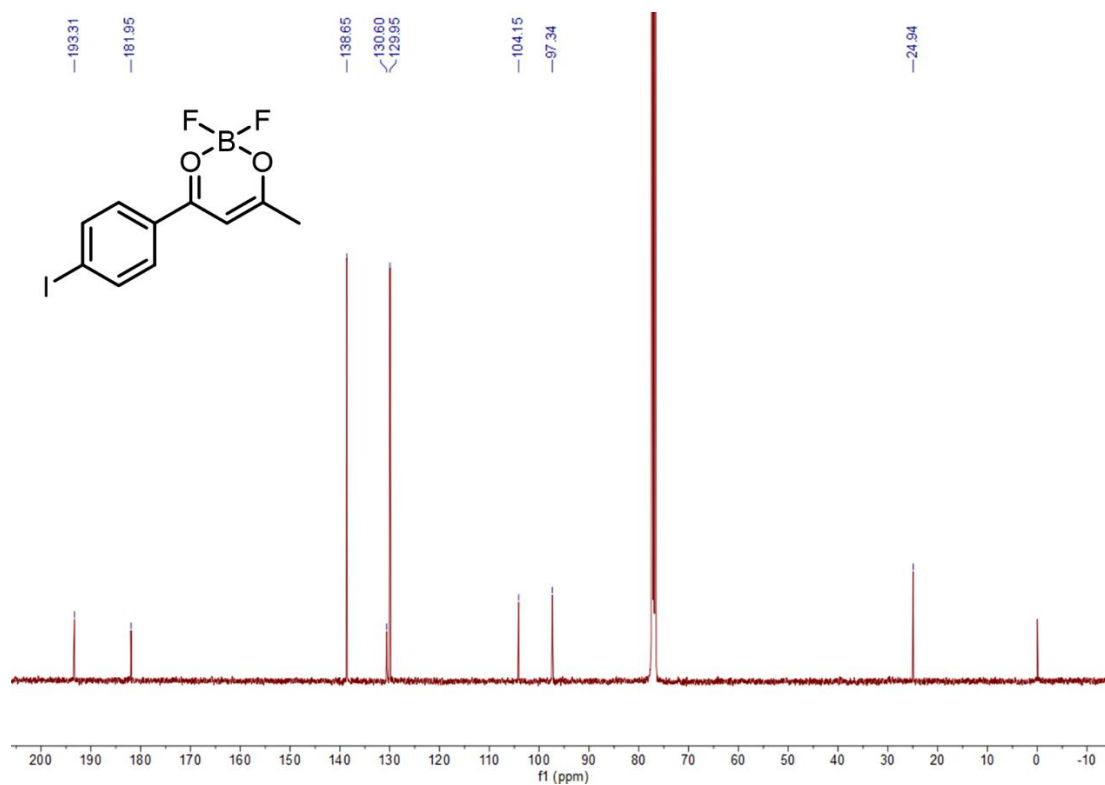

**Figure S52.** <sup>13</sup>C NMR spectrum of IBF<sub>2</sub>

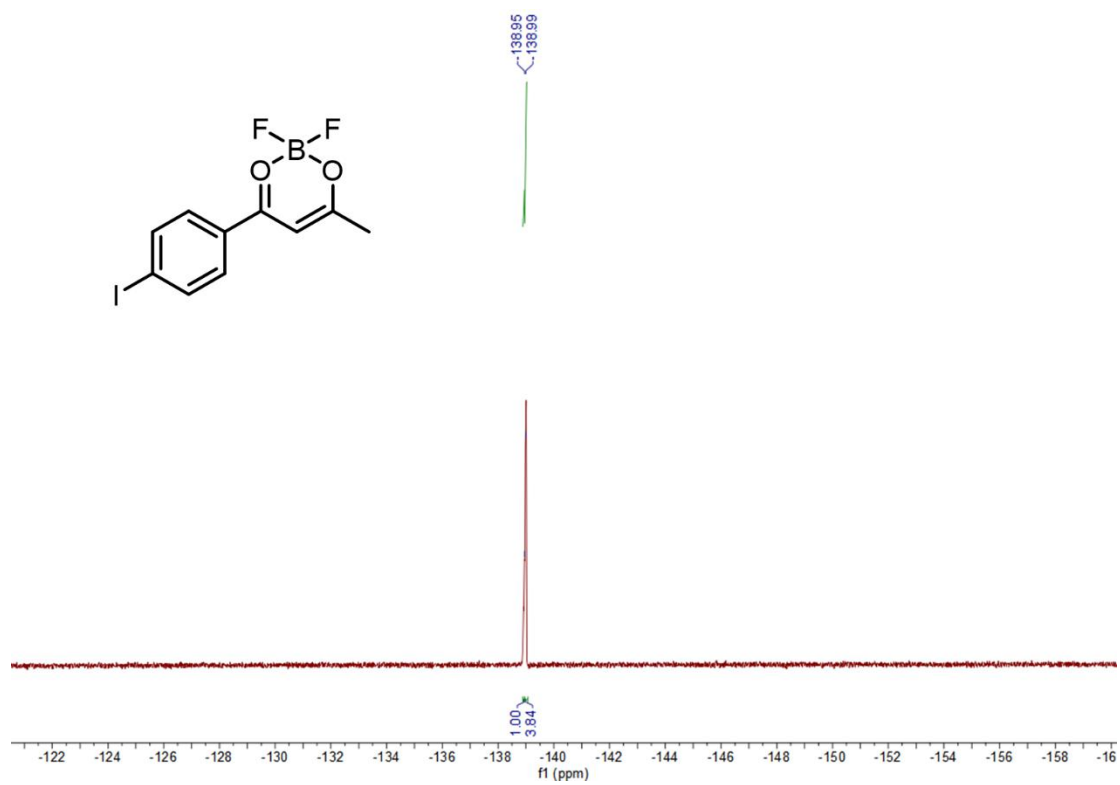

**Figure S53.** <sup>19</sup>F NMR spectrum of IBF<sub>2</sub>

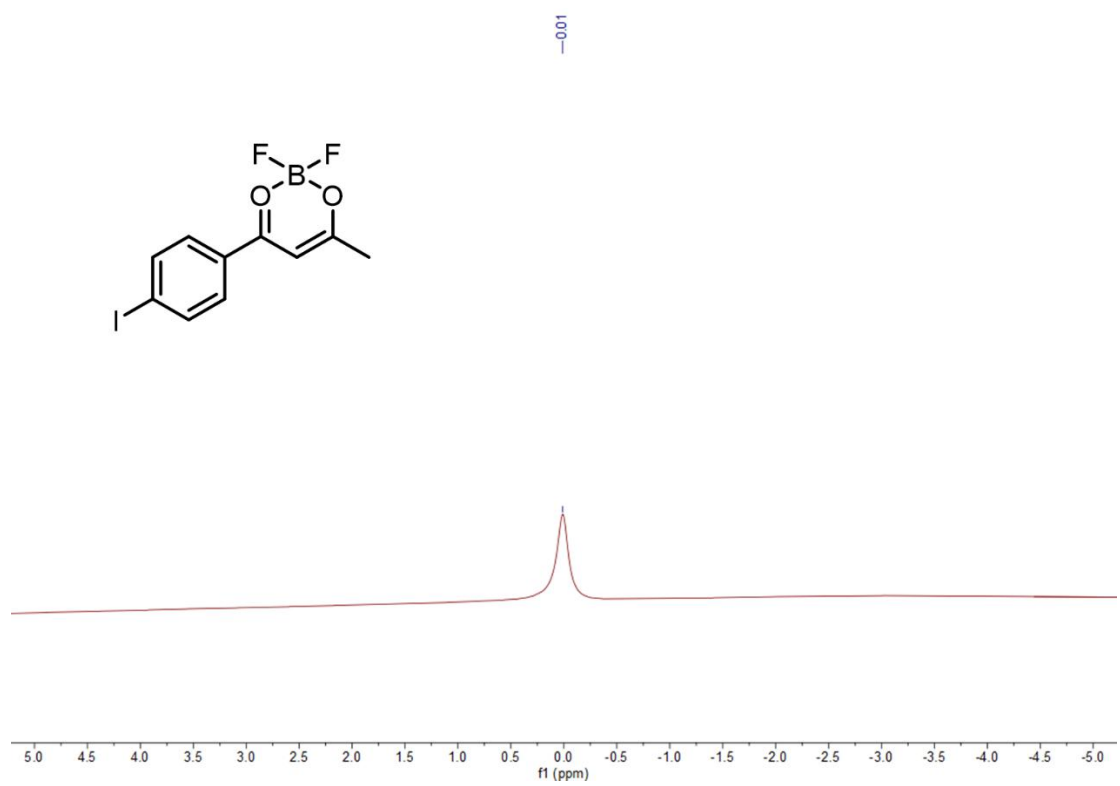

**Figure S54.** <sup>11</sup>B NMR spectrum of IBF<sub>2</sub>

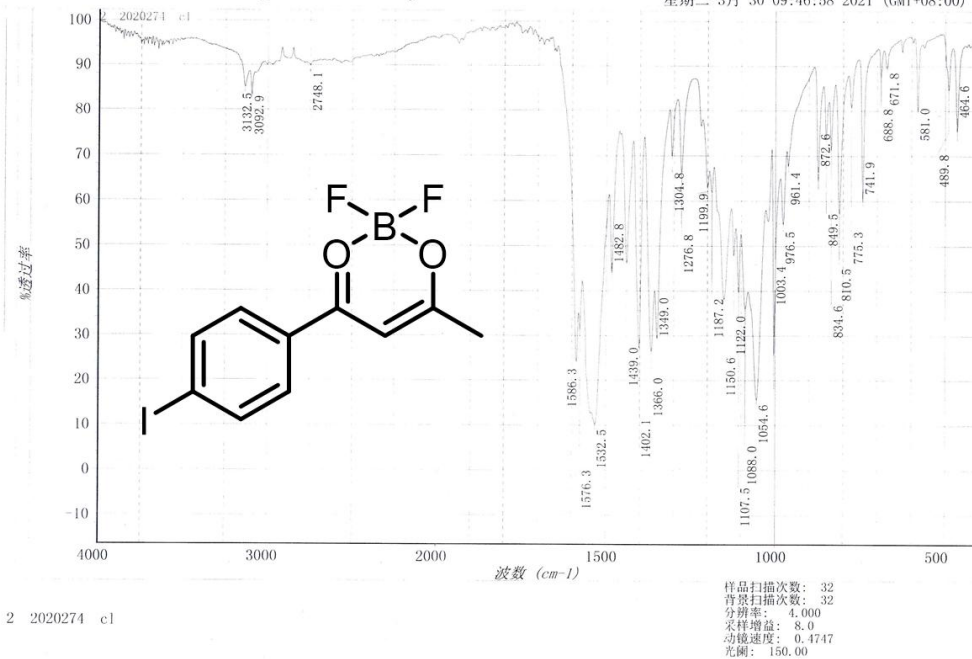

Figure S55. FT-IR spectrum of IBF<sub>2</sub>

文件 : E:\5973N date\2021\04\0412\H210855.D  
操作员 :  
已采集 : 12 Apr 2021 14:06 , 使用采集方法 default.m  
仪器: 5973N  
样品名: 5  
其他信息 : 336  
样品瓶号: 1

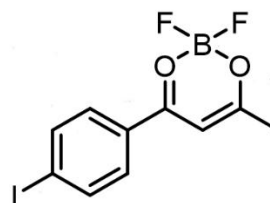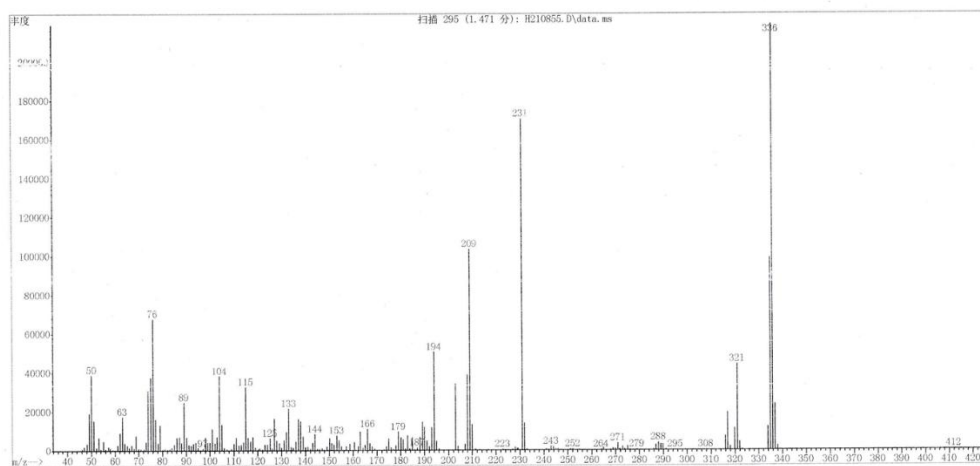

Figure S56. LRMS spectrum of IBF<sub>2</sub>

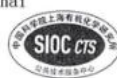

Instrument: JEOL-AccuTOF-GCv4G-GCT MS  
Operation Mode: FI Positive Ion Mode (Counter Electrode: 10000V)  
Card Serial Number: GCT-FI-T21-04-1490  
Sample Serial Number: 2020274-5  
Operator: Li Date: 2021/04/18

| m/z      | Theo. Mass | Delta (ppm) | RDB equiv. | Composition                                                                    |
|----------|------------|-------------|------------|--------------------------------------------------------------------------------|
| 334.9663 | 334.9663   | 0.06        | 3.5        | C <sub>8</sub> H <sub>8</sub> N <sub>2</sub> F <sub>4</sub> I                  |
| 334.9661 | 334.9661   | 0.62        | 6.0        | C <sub>10</sub> H <sub>8</sub> O <sub>2</sub> <sup>10</sup> B F <sub>2</sub> I |
| 334.9665 | 334.9665   | -0.69       | -2.5       | C <sub>4</sub> H <sub>14</sub> O <sub>4</sub> N <sub>2</sub> Cl FI             |
| 334.9666 | 334.9666   | -0.80       | 13.5       | C <sub>14</sub> H <sub>2</sub> O <sub>4</sub> N <sub>2</sub> Cl F <sub>2</sub> |
| 334.9666 | 334.9666   | -0.83       | 1.5        | C <sub>7</sub> H <sub>11</sub> ON <sup>10</sup> B Cl F <sub>2</sub> I          |

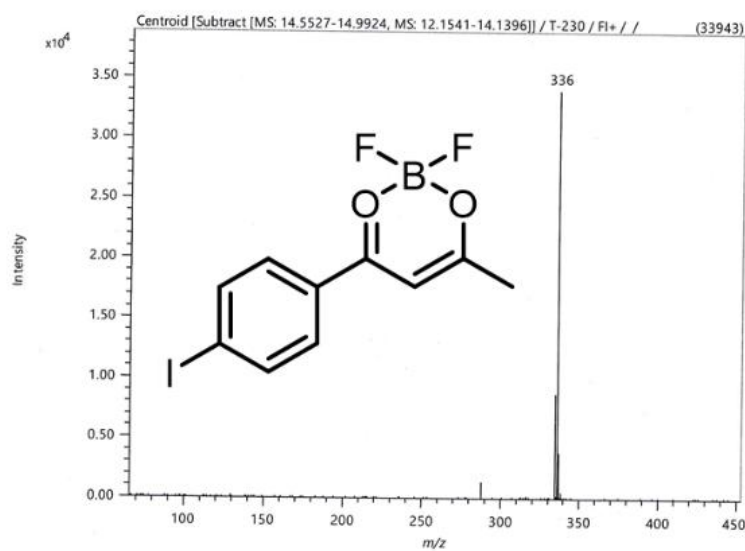

Figure S57. HRMS spectrum of IBF<sub>2</sub>

**Table S2.** Crystal data and structure refinement for d8v21153.

|                                   |                                                                |          |
|-----------------------------------|----------------------------------------------------------------|----------|
| Identification code               | d8v21153                                                       |          |
| Empirical formula                 | C <sub>10</sub> H <sub>9</sub> B F <sub>2</sub> O <sub>2</sub> |          |
| Formula weight                    | 209.98                                                         |          |
| Temperature                       | 293(2) K                                                       |          |
| Wavelength                        | 0.71073 Å                                                      |          |
| Crystal system                    | Orthorhombic                                                   |          |
| Space group                       | P n m a                                                        |          |
| Unit cell dimensions              | a = 12.5443(6) Å                                               | a = 90°. |
|                                   | b = 7.1138(4) Å                                                | b = 90°. |
|                                   | c = 10.9392(7) Å                                               | g = 90°. |
| Volume                            | 976.19(10) Å <sup>3</sup>                                      |          |
| Z                                 | 4                                                              |          |
| Density (calculated)              | 1.429 Mg/m <sup>3</sup>                                        |          |
| Absorption coefficient            | 0.121 mm <sup>-1</sup>                                         |          |
| F(000)                            | 432                                                            |          |
| Crystal size                      | 0.160 x 0.140 x 0.100 mm <sup>3</sup>                          |          |
| Theta range for data collection   | 3.248 to 25.980°.                                              |          |
| Index ranges                      | -15 ≤ h ≤ 15, -8 ≤ k ≤ 8, -13 ≤ l ≤ 13                         |          |
| Reflections collected             | 8339                                                           |          |
| Independent reflections           | 1030 [R(int) = 0.0292]                                         |          |
| Completeness to theta = 25.242°   | 99.1 %                                                         |          |
| Absorption correction             | Semi-empirical from equivalents                                |          |
| Max. and min. transmission        | 0.7456 and 0.6726                                              |          |
| Refinement method                 | Full-matrix least-squares on F <sup>2</sup>                    |          |
| Data / restraints / parameters    | 1030 / 0 / 96                                                  |          |
| Goodness-of-fit on F <sup>2</sup> | 1.069                                                          |          |
| Final R indices [I > 2σ(I)]       | R1 = 0.0384, wR2 = 0.1064                                      |          |
| R indices (all data)              | R1 = 0.0471, wR2 = 0.1162                                      |          |
| Extinction coefficient            | 0.078(17)                                                      |          |
| Largest diff. peak and hole       | 0.211 and -0.204 e.Å <sup>-3</sup>                             |          |

**Table S3.** Atomic coordinates (x 10<sup>4</sup>) and equivalent isotropic displacement parameters (Å<sup>2</sup>x 10<sup>3</sup>) for d8v21153. U(eq) is defined as one third of the trace of the orthogonalized U<sup>ij</sup> tensor.

|      | x       | y       | z       | U(eq) |
|------|---------|---------|---------|-------|
| F(1) | 1589(1) | 5928(1) | 4027(1) | 74(1) |

|       |         |      |         |       |
|-------|---------|------|---------|-------|
| O(1)  | 2623(1) | 7500 | 2616(1) | 64(1) |
| O(2)  | 3056(1) | 7500 | 4794(1) | 60(1) |
| C(1)  | 3922(2) | 7500 | 1077(2) | 66(1) |
| C(2)  | 3630(2) | 7500 | 2391(2) | 46(1) |
| C(3)  | 4374(1) | 7500 | 3315(2) | 46(1) |
| C(4)  | 4059(1) | 7500 | 4514(2) | 39(1) |
| C(5)  | 4795(1) | 7500 | 5562(2) | 40(1) |
| C(6)  | 4391(2) | 7500 | 6739(2) | 63(1) |
| C(7)  | 5071(2) | 7500 | 7735(2) | 72(1) |
| C(8)  | 6149(2) | 7500 | 7564(2) | 57(1) |
| C(9)  | 6563(2) | 7500 | 6402(2) | 51(1) |
| C(10) | 5895(1) | 7500 | 5406(2) | 46(1) |
| B(1)  | 2190(2) | 7500 | 3870(2) | 51(1) |

---

**Table S4.** Bond lengths [Å] and angles [°] for d8v21153.

---

|            |            |
|------------|------------|
| F(1)-B(1)  | 1.3597(15) |
| O(1)-C(2)  | 1.287(2)   |
| O(1)-B(1)  | 1.475(3)   |
| O(2)-C(4)  | 1.295(2)   |
| O(2)-B(1)  | 1.483(3)   |
| C(1)-C(2)  | 1.483(3)   |
| C(1)-H(1A) | 0.93(2)    |
| C(1)-H(1B) | 0.97(4)    |
| C(2)-C(3)  | 1.376(3)   |
| C(3)-C(4)  | 1.370(2)   |
| C(3)-H(3)  | 0.9300     |
| C(4)-C(5)  | 1.472(2)   |
| C(5)-C(6)  | 1.384(3)   |
| C(5)-C(10) | 1.391(2)   |
| C(6)-C(7)  | 1.385(3)   |
| C(6)-H(6)  | 0.9300     |
| C(7)-C(8)  | 1.365(3)   |
| C(7)-H(7)  | 0.9300     |
| C(8)-C(9)  | 1.373(3)   |
| C(8)-H(8)  | 0.9300     |
| C(9)-C(10) | 1.374(3)   |

|                  |            |
|------------------|------------|
| C(9)-H(9)        | 0.9300     |
| C(10)-H(10)      | 0.9300     |
| B(1)-F(1)#1      | 1.3596(15) |
|                  |            |
| C(2)-O(1)-B(1)   | 122.66(15) |
| C(4)-O(2)-B(1)   | 123.41(15) |
| C(2)-C(1)-H(1A)  | 107.7(13)  |
| C(2)-C(1)-H(1B)  | 113.8(19)  |
| H(1A)-C(1)-H(1B) | 112.2(16)  |
| O(1)-C(2)-C(3)   | 121.62(17) |
| O(1)-C(2)-C(1)   | 115.36(18) |
| C(3)-C(2)-C(1)   | 123.01(18) |
| C(4)-C(3)-C(2)   | 120.56(17) |
| C(4)-C(3)-H(3)   | 119.7      |
| C(2)-C(3)-H(3)   | 119.7      |
| O(2)-C(4)-C(3)   | 120.41(15) |
| O(2)-C(4)-C(5)   | 115.19(15) |
| C(3)-C(4)-C(5)   | 124.40(16) |
| C(6)-C(5)-C(10)  | 118.56(17) |
| C(6)-C(5)-C(4)   | 119.66(16) |
| C(10)-C(5)-C(4)  | 121.78(16) |
| C(5)-C(6)-C(7)   | 120.43(19) |
| C(5)-C(6)-H(6)   | 119.8      |
| C(7)-C(6)-H(6)   | 119.8      |
| C(8)-C(7)-C(6)   | 120.2(2)   |
| C(8)-C(7)-H(7)   | 119.9      |
| C(6)-C(7)-H(7)   | 119.9      |
| C(7)-C(8)-C(9)   | 120.11(19) |
| C(7)-C(8)-H(8)   | 119.9      |
| C(9)-C(8)-H(8)   | 119.9      |
| C(8)-C(9)-C(10)  | 120.24(18) |
| C(8)-C(9)-H(9)   | 119.9      |
| C(10)-C(9)-H(9)  | 119.9      |
| C(9)-C(10)-C(5)  | 120.48(17) |
| C(9)-C(10)-H(10) | 119.8      |
| C(5)-C(10)-H(10) | 119.8      |
| F(1)#1-B(1)-F(1) | 110.69(17) |
| F(1)#1-B(1)-O(1) | 108.76(12) |



|                  |            |
|------------------|------------|
| F(1)-B(1)-O(1)   | 108.76(12) |
| F(1)#1-B(1)-O(2) | 108.66(12) |
| F(1)-B(1)-O(2)   | 108.66(12) |
| O(1)-B(1)-O(2)   | 111.34(15) |

---

Symmetry transformations used to generate equivalent atoms:

#1  $x, -y+3/2, z$

**Table S5.** Crystal data and structure refinement for mo\_d8v20839\_0m.

|                                   |                                             |                   |
|-----------------------------------|---------------------------------------------|-------------------|
| Identification code               | mo_d8v20839_0m                              |                   |
| Empirical formula                 | C10 H8 B F2 I O2                            |                   |
| Formula weight                    | 335.87                                      |                   |
| Temperature                       | 293(2) K                                    |                   |
| Wavelength                        | 0.71073 Å                                   |                   |
| Crystal system                    | Monoclinic                                  |                   |
| Space group                       | P 21/n                                      |                   |
| Unit cell dimensions              | a = 7.6012(3) Å                             | a = 90°.          |
|                                   | b = 14.2747(5) Å                            | b = 91.8010(10)°. |
|                                   | c = 10.6115(4) Å                            | g = 90°.          |
| Volume                            | 1150.83(7) Å <sup>3</sup>                   |                   |
| Z                                 | 4                                           |                   |
| Density (calculated)              | 1.939 Mg/m <sup>3</sup>                     |                   |
| Absorption coefficient            | 2.789 mm <sup>-1</sup>                      |                   |
| F(000)                            | 640                                         |                   |
| Crystal size                      | 0.200 x 0.160 x 0.130 mm <sup>3</sup>       |                   |
| Theta range for data collection   | 2.392 to 25.999°.                           |                   |
| Index ranges                      | -9<=h<=9, -17<=k<=17, -13<=l<=13            |                   |
| Reflections collected             | 15738                                       |                   |
| Independent reflections           | 2235 [R(int) = 0.0494]                      |                   |
| Completeness to theta = 25.242°   | 98.7 %                                      |                   |
| Absorption correction             | Semi-empirical from equivalents             |                   |
| Max. and min. transmission        | 0.7456 and 0.4111                           |                   |
| Refinement method                 | Full-matrix least-squares on F <sup>2</sup> |                   |
| Data / restraints / parameters    | 2235 / 0 / 147                              |                   |
| Goodness-of-fit on F <sup>2</sup> | 1.071                                       |                   |
| Final R indices [I>2sigma(I)]     | R1 = 0.0296, wR2 = 0.0780                   |                   |
| R indices (all data)              | R1 = 0.0318, wR2 = 0.0798                   |                   |
| Extinction coefficient            | 0.0151(17)                                  |                   |
| Largest diff. peak and hole       | 1.001 and -0.586 e.Å <sup>-3</sup>          |                   |

**Table S6.** Atomic coordinates ( $\times 10^4$ ) and equivalent isotropic displacement parameters ( $\text{\AA}^2 \times 10^3$ ) for mo\_d8v20839\_0m. U(eq) is defined as one third of the trace of the orthogonalized  $U^{ij}$  tensor.

|       | x       | y       | z       | U(eq) |
|-------|---------|---------|---------|-------|
| I(1)  | 8175(1) | 3443(1) | 8477(1) | 58(1) |
| F(1)  | 5421(4) | 8027(2) | 3294(2) | 74(1) |
| F(2)  | 8303(4) | 8371(2) | 3103(3) | 77(1) |
| O(1)  | 6992(3) | 7308(2) | 1715(2) | 47(1) |
| O(2)  | 7517(3) | 6952(2) | 3954(2) | 47(1) |
| C(1)  | 7083(4) | 4498(2) | 4701(3) | 43(1) |
| C(2)  | 7257(5) | 3924(2) | 5756(3) | 46(1) |
| C(3)  | 7956(4) | 4285(2) | 6866(3) | 39(1) |
| C(4)  | 8489(5) | 5209(2) | 6950(3) | 45(1) |
| C(5)  | 8302(4) | 5782(2) | 5907(3) | 40(1) |
| C(6)  | 7587(4) | 5434(2) | 4773(3) | 34(1) |
| C(7)  | 7339(4) | 6063(2) | 3694(3) | 35(1) |
| C(8)  | 6983(4) | 5769(2) | 2468(3) | 41(1) |
| C(9)  | 6893(4) | 6421(2) | 1502(3) | 40(1) |
| C(10) | 6753(5) | 6151(3) | 155(3)  | 54(1) |
| B(1)  | 7055(6) | 7695(3) | 3024(4) | 48(1) |

**Table S7.** Bond lengths [ $\text{\AA}$ ] and angles [ $^\circ$ ] for mo\_d8v20839\_0m.

|           |          |
|-----------|----------|
| I(1)-C(3) | 2.092(3) |
| F(1)-B(1) | 1.368(5) |
| F(2)-B(1) | 1.353(5) |
| O(1)-C(9) | 1.289(4) |
| O(1)-B(1) | 1.494(4) |
| O(2)-C(7) | 1.304(4) |
| O(2)-B(1) | 1.484(4) |
| C(1)-C(2) | 1.390(5) |
| C(1)-C(6) | 1.391(4) |
| C(1)-H(1) | 0.9300   |
| C(2)-C(3) | 1.377(5) |
| C(2)-H(2) | 0.9300   |
| C(3)-C(4) | 1.382(4) |

|              |          |
|--------------|----------|
| C(4)-C(5)    | 1.380(4) |
| C(4)-H(4)    | 0.9300   |
| C(5)-C(6)    | 1.395(4) |
| C(5)-H(5)    | 0.9300   |
| C(6)-C(7)    | 1.463(4) |
| C(7)-C(8)    | 1.385(4) |
| C(8)-C(9)    | 1.384(4) |
| C(8)-H(8)    | 0.9300   |
| C(9)-C(10)   | 1.482(4) |
| C(10)-H(10A) | 0.9600   |
| C(10)-H(10B) | 0.9600   |
| C(10)-H(10C) | 0.9600   |

|                |          |
|----------------|----------|
| C(9)-O(1)-B(1) | 121.8(2) |
| C(7)-O(2)-B(1) | 122.3(2) |
| C(2)-C(1)-C(6) | 120.2(3) |
| C(2)-C(1)-H(1) | 119.9    |
| C(6)-C(1)-H(1) | 119.9    |
| C(3)-C(2)-C(1) | 119.5(3) |
| C(3)-C(2)-H(2) | 120.3    |
| C(1)-C(2)-H(2) | 120.3    |
| C(2)-C(3)-C(4) | 121.1(3) |
| C(2)-C(3)-I(1) | 120.2(2) |
| C(4)-C(3)-I(1) | 118.7(2) |
| C(5)-C(4)-C(3) | 119.4(3) |
| C(5)-C(4)-H(4) | 120.3    |
| C(3)-C(4)-H(4) | 120.3    |
| C(4)-C(5)-C(6) | 120.5(3) |
| C(4)-C(5)-H(5) | 119.7    |
| C(6)-C(5)-H(5) | 119.7    |
| C(1)-C(6)-C(5) | 119.2(3) |
| C(1)-C(6)-C(7) | 121.2(3) |
| C(5)-C(6)-C(7) | 119.6(3) |
| O(2)-C(7)-C(8) | 120.6(3) |
| O(2)-C(7)-C(6) | 114.9(2) |
| C(8)-C(7)-C(6) | 124.4(3) |
| C(9)-C(8)-C(7) | 119.7(3) |
| C(9)-C(8)-H(8) | 120.1    |

|                     |          |
|---------------------|----------|
| C(7)-C(8)-H(8)      | 120.1    |
| O(1)-C(9)-C(8)      | 122.0(3) |
| O(1)-C(9)-C(10)     | 115.3(3) |
| C(8)-C(9)-C(10)     | 122.7(3) |
| C(9)-C(10)-H(10A)   | 109.5    |
| C(9)-C(10)-H(10B)   | 109.5    |
| H(10A)-C(10)-H(10B) | 109.5    |
| C(9)-C(10)-H(10C)   | 109.5    |
| H(10A)-C(10)-H(10C) | 109.5    |
| H(10B)-C(10)-H(10C) | 109.5    |
| F(2)-B(1)-F(1)      | 112.3(3) |
| F(2)-B(1)-O(2)      | 108.5(3) |
| F(1)-B(1)-O(2)      | 107.8(3) |
| F(2)-B(1)-O(1)      | 108.9(3) |
| F(1)-B(1)-O(1)      | 108.6(3) |
| O(2)-B(1)-O(1)      | 110.7(3) |

---

Symmetry transformations used to generate equivalent atoms:

## References

1. Fermi, G. Bergamini, R. Peresutti, E. Marchi, M. Roy, P. Ceroni, M. Gingras, *Dyes Pigments*. 2014, **110**, 113.
2. L. Xu, G. Li, T. Xu, W. Zhang, S. Zhang, S. Yin, Z. An, G. He, *Chem. Commun.* 2018, **54**, 9226.
3. Bolton, K. Lee, H. J. Kim, K. Y. Lin, J. Kim, *Nat. Chem.* 2011, **3**, 205.
4. Z. Y. Zhang, Y. Chen, Y. Liu, *Angew. Chem. Int. Ed.* 2019, **58**, 6028.
5. L. Xiao, Y. Wu, J. Chen, Z. Yu, Y. Liu, J. Yao, H. Fu, *J. Phys. Chem. A* 2017, **121**, 8652.
6. S. Xu, W. Wang, H. Li, J. Zhang, R. Chen, S. Wang, C. Zheng, G. Xing, C. Song, W. Huang, *Nat. Commun.* 2020, **11**, 4802.
7. Z. Yang, C. Xu, W. Li, Z. Mao, X. Ge, Q. Huang, H. Deng, J. Zhao, F. L. Gu, Y. Zhang, Z. Chi, *Angew. Chem. Int. Ed.* 2020, **59**, 17451.
8. W. Zhao, T. S. Cheung, N. Jiang, W. Huang, J. W. Y. Lam, X. Zhang, Z. He, B. Z. Tang, *Nat. Commun.* 2019, **10**, 1595.
9. H. Shi, L. Song, H. Ma, C. Sun, K. Huang, A. Lv, W. Ye, H. Wang, S. Cai, W. Yao, Y. Zhang, R. Zheng, Z. An, W. Huang, *J. Phys. Chem. Lett.* 2019, **10**, 595.
10. Z. Yin, M. Gu, H. Ma, X. Jiang, J. Zhi, Y. Wang, H. Yang, W. Zhu, Z. An, *Angew. Chem. Int. Ed.* 2021, **60**, 2058.
11. P. Xue, P. Wang, P. Chen, B. Yao, P. Gong, J. Sun, Z. Zhang, R. Lu, *Chem. Sci.* 2017, **8**, 6060.
12. J. Jin, H. Jiang, Q. Yang, L. Tang, Y. Tao, Y. Li, R. Chen, C. Zheng, Q. Fan, K. Y. Zhang, Q. Zhao, W. Huang, *Nat. Commun.* 2020, **11**, 842.

13. Bhattacharjee, S. Hirata, *Adv. Mater.* 2020, **32**, 2001348.
14. X. Liu, W. Dai, J. Qian, Y. Lei, M. Liu, Z. Cai, X. Huang, H. Wu, Y. Dong, *J. Mater. Chem. C* 2021, **9**, 3391.
15. X. Wang, Y. Sun, G. Wang, J. Li, X. Li, K. Zhang, *Angew. Chem. Int. Ed.* 2021, **26**, 17138.
16. Y. Wen, H. Liu, S. Zhang, Y. Gao, Y. Yan, B. Yang, *J. Mater. Chem. C* 2019, **7**, 12502.
17. L. Gu, H. Wu, H. Ma, W. Ye, W. Jia, H. Wang, H. Chen, N. Zhang, D. Wang, C. Qian, Z. An, W. Huang, Y. Zhao, *Nat. Commun.* 2020, **11**, 944.
18. W. Z. Yuan, X. Y. Shen, H. Zhao, J. W. Y. Lam, L. Tang, P. Lu, C. Wang, Y. Liu, Z. Wang, Q. Zheng, J. Z. Sun, Y. Ma, B. Z. Tang, *J. Phys. Chem. C* 2010, **114**, 6090.
19. J. Wang, C. Wang, Y. Gong, Q. Liao, M. Han, T. Jiang, Q. Dang, Y. Li, Q. Li, Z. Li, *Angew. Chem. Int. Ed.* 2018, **57**, 16821
20. J. Wang, X. Gu, H. Ma, Q. Peng, X. Huang, X. Zheng, S. H. P. Sung, G. Shan, J. W. Y. Lam, Z. Shuai, B. Z. Tang, *Nat. Commun.* 2018, **9**, 2963.
21. M. Villa, B. D. Secco, L. Ravotto, M. Roy, E. Rampazzo, N. Zaccheroni, L. Prodi, M. Gingras, S. A. Vinogradov, P. Ceroni, *J. Phys. Chem. C* 2019, **123**, 29884.
22. H. Wu, C. Hang, X. Li, L. Yin, M. Zhu, J. Zhang, Y. Zhou, H. Agren, Q. Zhang, L. Zhu, *Chem. Commun.* 2017, **53**, 2661.
23. H. Wu, Y. Zhou, L. Yin, C. Hang, X. Li, H. Agren, T. Yi, Q. Zhang, L. Zhu, *J. Am. Chem. Soc.* 2017, **139**, 2, 785.
24. Z. Mao, Z. Yang, Y. Mu, Y. Zhang, Y.-F. Wang, Z. Chi, C.-C. Lo, S. Liu, A. Lien, J. Xu, *Angew. Chem. Int. Ed.* 2015, **54**, 6270.
25. Y. Gong, G. Chen, Q. Peng, W. Z. Yuan, Y. Xie, S. Li, Y. Zhang, B. Z. Tang, *Adv. Mater.* 2015, **27**, 6195.
26. S. Cai, H. Shi, J. Li, L. Gu, Y. Ni, Z. Cheng, S. Wang, W. Xiong, L. Li, Z. An, W. Huang, *Adv. Mater.* 2017, **29**, 1701244.
27. Z. Yang, Z. Mao, X. Zhang, D. Ou, Y. Mu, Y. Zhang, C. Zhao, S. Liu, Z. Chi, J. Xu, Y.-C. Wu, P.-Y. Lu, A. Lien, M. R. Bryce, *Angew. Chem. Int. Ed.* 2016, **55**, 2181.
28. S. M. A. Fateminia, Z. Mao, S. Xu, Z. Yang, Z. Chi, B. Liu, *Angew. Chem. Int. Ed.* 2017, **56**, 12160.
29. G. Zhang, G. M. Palmer, M. W. Dewhirst, C. L. Fraser, *Nat. Mater.* **2009**, 8, 747.
30. Z.-Y. Zhang, Y. Liu, *Chem. Sci.* 2019, **10**, 7773.
31. X.-K. Ma, W. Zhang, Z. Liu, H. Zhang, B. Zhang, Y. Liu, *Adv. Mater.* 2021, 2007476.
32. M. S. Kwon, Y. Yu, C. Coburn, A. W. Phillips, K. Chung, A. Shanker, J. Jung, G. Kim, K. Pipe, S. R. Forrest, J. H. Youk, J. Gierschner, J. Kim, *Nat. Commun.* 2015, **6**, 8947.
33. J. A. Li, J. Zhou, Z. Mao, Z. Xie, Z. Yang, B. Xu, C. Liu, X. Chen, D. Ren, H. Pan, G. Shi, Y. Zhang, Z. Chi, *Angew. Chem. Int. Ed.* 2018, **57**, 6449.
34. S. Xu, R. Chen, C. Zheng, W. Huang, *Adv. Mater.* 2016, **28**, 9920.
35. J. Wei, B. Liang, R. Duan, Z. Cheng, C. Li, T. Zhou, Y. Yi, Y. Wang, *Angew. Chem. Int. Ed.* 2016, **55**, 15589.
36. J. Yang, X. Zhen, B. Wang, X. Gao, Z. Ren, J. Wang, Y. Xie, J. Li, Q. Peng, K. Pu, Z. Li, *Nat. Commun.* 2018, **9**, 840.
37. E. Lucenti, A. Forni, C. Botta, L. Carlucci, C. Giannini, D. Marinotto, A. Pavanello, A. Previtali, S. Righetto, E. Cariati, *Angew. Chem. Int. Ed.* 2017, **56**, 16302.
38. X. F. Wang, H. Xiao, P. Z. Chen, Q. Z. Yang, B. Chen, C. H. Tung, Y. Z. Chen, L. Z. Wu, *J.*

- Am. Chem. Soc.* 2019, **141**, 5045.
39. W. Zhao, T. S. Cheung, N. Jiang, W. Huang, J. W. Y. Lam, X. Zhang, Z. He, B. Z. Tang, *Nat. Commun.* 2019, **10**, 1595.
  40. T. Zhang, C. Wang, X. Ma, *Ind. Eng. Chem. Res.* 2019, **58**, 7778.
  41. B. Li, Y. Gong, L. Wang, H. Lin, Q. Li, F. Guo, Z. Li, Q. Peng, Z. Shuai, L. Zhao, Y. Zhang, *J. Phys. Chem. Lett.* 2019, **10**, 7141.
  42. J. Yuan, R. Chen, X. Tang, Y. Tao, S. Xu, L. Jin, C. Chen, X. Zhou, C. Zheng, W. Huang, *Chem. Sci.* 2019, **10**, 5031.
  43. H. Ma, A. Lv, L. Fu, S. Wang, Z. An, H. Shi, W. Huang, *Ann. Phys. (Berlin)* 2019, **531**, 1800482.
  44. X. Ma, J. Cao, Q. Wang, H. Tian, *Chem. Commun.* 2011, **47**, 3559.
  45. H. Shi, L. Zou, K. Huang, H. Wang, C. Sun, S. Wang, H. Ma, Y. He, J. Wang, H. Yu, W. Yao, Z. An, Q. Zhao, W. Huang, *ACS Appl. Mater. Interfaces* 2019, **11**, 18103.
  46. D. Liu, A. M. El-Zohry, M. Taddei, C. Matt, L. Bussotti, Z. Wang, J. Zhao, O. F. Mohammed, M. D. Donato, S. Weber, *Angew. Chem. Int. Ed.* 2020, **59**, 11591.
  47. P. She, Y. Yu, Y. Qin, Y. Zhang, F. Li, Y. Ma, S. Liu, W. Huang, Q. Zhao, *Adv. Optical Mater.* 2020, **8**, 1901437.
  48. X.-N. Li, M. Yang, X.-L. Chen, J.-H. Jia, W.-W. Zhao, X.-Y. Wu, S.-S. Wang, L. Meng, C.-Z. Lu, *Small* 2019, **15**, 1903270.
  49. D. R. Lee, K. H. Lee, W. Shao, C. L. Kim, J. Kim, J. Y. Lee, *Chem. Mater.* 2020, **32**, 2583.
  50. X. Chen, C. Xu, T. Wang, C. Zhou, J. Du, Z. Wang, H. Xu, T. Xie, G. Bi, J. Jiang, X. Zhang, J. N. Demas, C. O. Trindle, Y. Luo, G. Zhang, *Angew. Chem. Int. Ed.* 2016, **55**, 9872.
  51. H. Chen, X. Yao, X. Ma, H. Tian, *Adv. Optical Mater.* 2016, **4**, 1397.
  52. S. Cai, H. Shi, D. Tian, H. Ma, Z. Cheng, Q. Wu, M. Gu, L. Huang, Z. An, Q. Peng, W. Huang, *Adv. Funct. Mater.* 2018, **28**, 1705045.
  53. A. Fermi, G. Bergamini, M. Roy, M. Gingras, P. Ceroni, *J. Am. Chem. Soc.* 2014, **136**, 6395.
  54. Z. He, W. Zhao, J. W. Y. Lam, Q. Peng, H. Ma, G. Liang, Z. Shuai, B. Z. Tang, *Nat. Commun.* 2017, **8**, 416.
  55. G. He, W. T. Delgado, D. J. Schatz, C. Merten, A. Mohammadpour, L. Mayr, M. J. Ferguson, R. McDonald, A. Brown, K. Shankar, E. Rivard, *Angew. Chem. Int. Ed.* 2014, **53**, 4587.
  56. K. Kanosue, S. Hirata, M. Vacha, R. Augulis, V. Gulbinas, R. Ishige, S. Ando, *Mater. Chem. Front.* 2019, **3**, 39.
  57. S. Hirata, *Adv. Sci.* 2019, **6**, 1900410.
  58. W. T. Delgado, C. A. Braun, M. P. Boone, O. Shynkaruk, Y. Qi, R. McDonald, M. J. Ferguson, P. Data, S. K. C. Almeida, I. de Aguiar, G. L. C. de Souza, A. Brown, G. He, E. Rivard, *ACS Appl. Mater. Interfaces* 2018, **10**, **15**, 12124.
  59. Q. J. Shen, H. Q. Wei, W. S. Zou, H. L. Sun, W. J. Jin, *CrystEngComm* 2012, **14**, 1010.
  60. M. S. Kwon, D. Lee, S. Seo, J. Jung, J. Kim, *Angew. Chem.* 2014, **126**, 11359.
